# Supplementary material for: Chemical constituents from Carica papaya Linn. leaves as potential cytotoxic, EGFRwt and aromatase (CYP19A) inhibitors; a study supported by molecular docking
Source: Royal Society of Chemistry journal article supplement (doi:10.1039/d1ra07000b), 2022-01-01
Supplement: d1ra07000b1.pdf [file d1ra07000b1.pdf]

**Supplementary Information for**

**Chemical constituents from *Carica papaya* Linn. leaves as potential cytotoxic, EGFR<sup>wt</sup> and Aromatase (CYP19A) inhibitors; a study supported by molecular docking**

Ashraf N. E. Hamed,<sup>a</sup> Mohamed E. Abouelela,<sup>b</sup> Ahmed E. El Zowalaty,<sup>c,d,e</sup> Mohamed M. Badr,<sup>f</sup> Mohamed S. A. Abdelkader,<sup>g,\*</sup>

<sup>a</sup>Department of Pharmacognosy, Faculty of Pharmacy, Minia University, Minia 61519, Egypt.

<sup>b</sup>Department of Pharmacognosy, Faculty of Pharmacy, Al-Azhar University, Assiut-Branch, Assiut, 71524, Egypt.

<sup>c</sup>Sahlgrenska Center for Cancer Research, Department of Surgery, Institute of Clinical Sciences, University of Gothenburg, 40530 Gothenburg, Sweden.

<sup>d</sup>Wallenberg Centre for Molecular and Translational Medicine, University of Gothenburg, 40530 Gothenburg, Sweden.

<sup>e</sup>Department of Pharmacology and Toxicology, Faculty of Pharmacy, Zagazig University, 44519, Egypt.

<sup>f</sup>Department of Biochemistry, Faculty of Pharmacy, Menoufia University, Menoufia, 32511, Egypt.

<sup>g</sup>Department of Pharmacognosy, Faculty of Pharmacy, Sohag University, Sohag, 82524, Egypt.

**\*Corresponding Author:**

Mohamed S.A. Abdelkader: m.salaheldin@pharm.sohag.edu.eg

## Contents

| Figure                                                                                                | Page |
|-------------------------------------------------------------------------------------------------------|------|
| <b>Fig. S1</b> $^1\text{H}$ -NMR spectrum of compound <b>1</b> (400 MHz, $\text{CD}_3\text{OD}$ ).    | 4    |
| <b>Fig. S2</b> $^{13}\text{C}$ -NMR spectrum of compound <b>1</b> (100 MHz, $\text{CD}_3\text{OD}$ ). | 4    |
| <b>Fig. S3</b> HSQC spectrum of compound <b>1</b> .                                                   | 5    |
| <b>Fig. S4.</b> $^1\text{H}$ - $^1\text{H}$ COSY spectrum of compound <b>1</b> .                      | 5    |
| <b>Fig. S5</b> HMBC spectrum of compound <b>1</b> .                                                   | 6    |
| <b>Fig. S6</b> Positive HR-ESI-MS spectrum of compound <b>1</b> .                                     | 6    |
| <b>Fig. S7</b> $^1\text{H}$ -NMR spectrum of compound <b>2</b> (400 MHz, $\text{CD}_3\text{OD}$ ).    | 7    |
| <b>Fig. S8</b> $^1\text{H}$ -NMR spectrum of compound <b>3</b> (400 MHz, $\text{CD}_3\text{OD}$ ).    | 7    |
| <b>Fig. S9</b> $^{13}\text{C}$ -NMR spectrum of compound <b>3</b> (100 MHz, $\text{CD}_3\text{OD}$ ). | 8    |
| <b>Fig. S10</b> HSQC spectrum of compound <b>3</b> .                                                  | 8    |
| <b>Fig. S11</b> HMBC spectrum of compound <b>3</b> .                                                  | 9    |
| <b>Fig. S12</b> $^1\text{H}$ - $^1\text{H}$ COSY spectrum of compound <b>3</b>                        | 9    |
| <b>Fig. S13</b> Positive HR-ESI-MS spectrum of compound <b>3</b> .                                    | 10   |
| <b>Fig. S14</b> $^1\text{H}$ -NMR spectrum of compound <b>4</b> (400 MHz, $\text{DMSO-}d_6$ ).        | 10   |
| <b>Fig. S15</b> $^{13}\text{C}$ -NMR spectrum of compound <b>4</b> (100 MHz, $\text{DMSO-}d_6$ ).     | 11   |
| <b>Fig. S16</b> HSQC spectrum of compound <b>4</b> .                                                  | 11   |
| <b>Fig. S17</b> HMBC spectrum of compound <b>4</b> .                                                  | 12   |
| <b>Fig. S18</b> Positive HR-ESI-MS spectrum of compound <b>4</b> .                                    | 12   |
| <b>Fig. S19</b> $^1\text{H}$ -NMR spectrum of compound <b>5</b> (400 MHz, $\text{DMSO-}d_6$ ).        | 13   |
| <b>Fig. S20</b> $^{13}\text{C}$ -NMR spectrum of compound <b>5</b> (100 MHz, $\text{DMSO-}d_6$ ).     | 13   |
| <b>Fig. S21</b> HSQC spectrum of compound <b>5</b> .                                                  | 14   |
| <b>Fig. S22</b> HMBC spectrum of compound <b>5</b> .                                                  | 14   |
| <b>Fig. S23</b> Positive HR-ESI-MS spectrum of compound <b>5</b> .                                    | 15   |
| <b>Fig. S24</b> $^1\text{H}$ -NMR spectrum of compound <b>6</b> (400 MHz, $\text{DMSO-}d_6$ ).        | 15   |
| <b>Fig. S25</b> Positive HR-ESI-MS spectrum of compound <b>6</b> .                                    | 16   |
| <b>Fig. S26</b> $^1\text{H}$ -NMR spectrum of compound <b>7</b> (400 MHz, $\text{DMSO-}d_6$ ).        | 16   |
| <b>Fig. S27</b> Positive HR-ESI-MS spectrum of compound <b>7</b> .                                    | 17   |
| <b>Fig. S28</b> $^1\text{H}$ -NMR spectrum of compound <b>8</b> (400 MHz, $\text{DMSO-}d_6$ ).        | 17   |

|                                                                                                            |    |
|------------------------------------------------------------------------------------------------------------|----|
| <b>Fig. S29</b> Positive HR-ESI-MS spectrum of compound <b>8</b> .                                         | 18 |
| <b>Fig. S30</b> <sup>1</sup> H-NMR spectrum of compound <b>9</b> (400 MHz, DMSO- <i>d</i> <sub>6</sub> ).  | 18 |
| <b>Fig. S31</b> <sup>13</sup> C-NMR spectrum of compound <b>9</b> (100 MHz, DMSO- <i>d</i> <sub>6</sub> ). | 19 |
| <b>Fig. S32</b> HSQC spectrum of compound <b>9</b> .                                                       | 19 |
| <b>Fig. S33</b> HMBC spectrum of compound <b>9</b> .                                                       | 20 |
| <b>Fig. S34</b> Positive HR-ESI-MS spectrum of compound <b>9</b> .                                         | 20 |

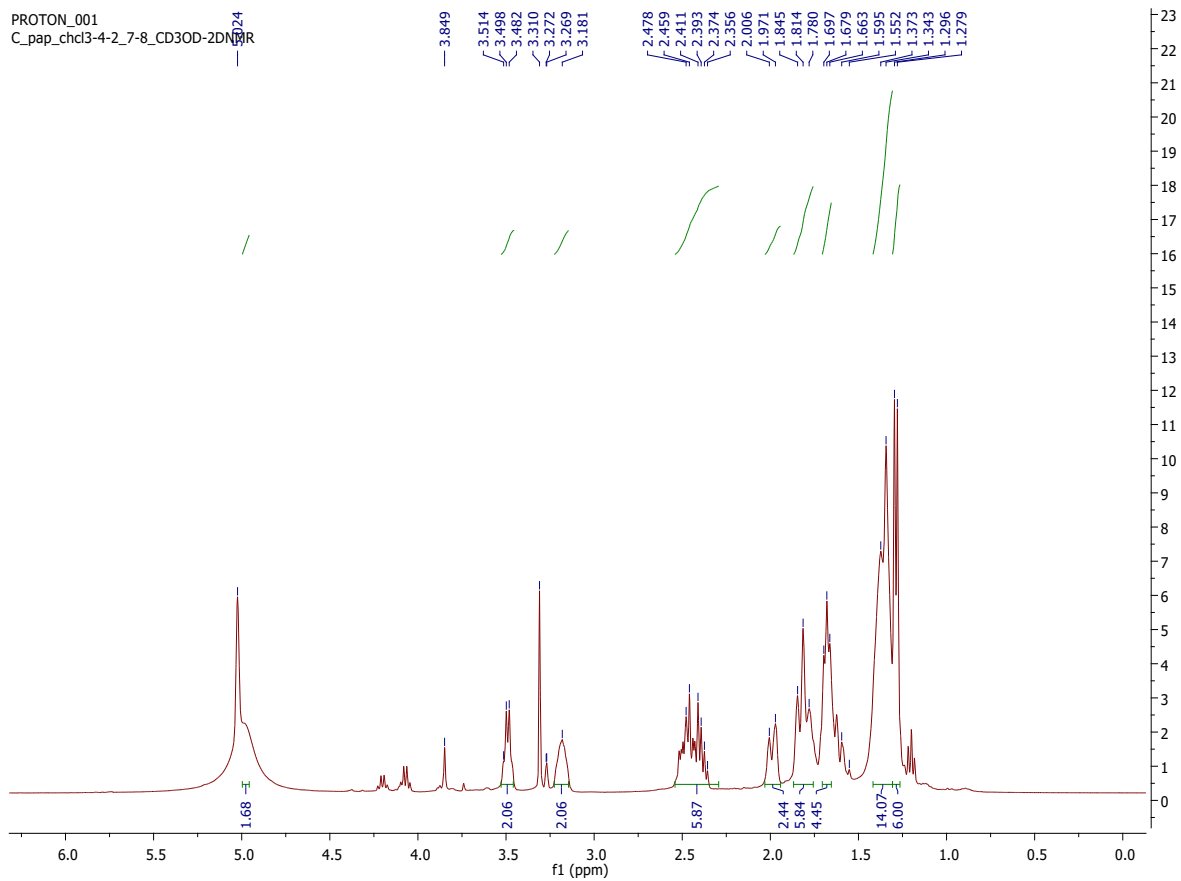

**Fig. S1**  $^1\text{H}$ -NMR spectrum of compound **1** (400 MHz,  $\text{CD}_3\text{OD}$ ).

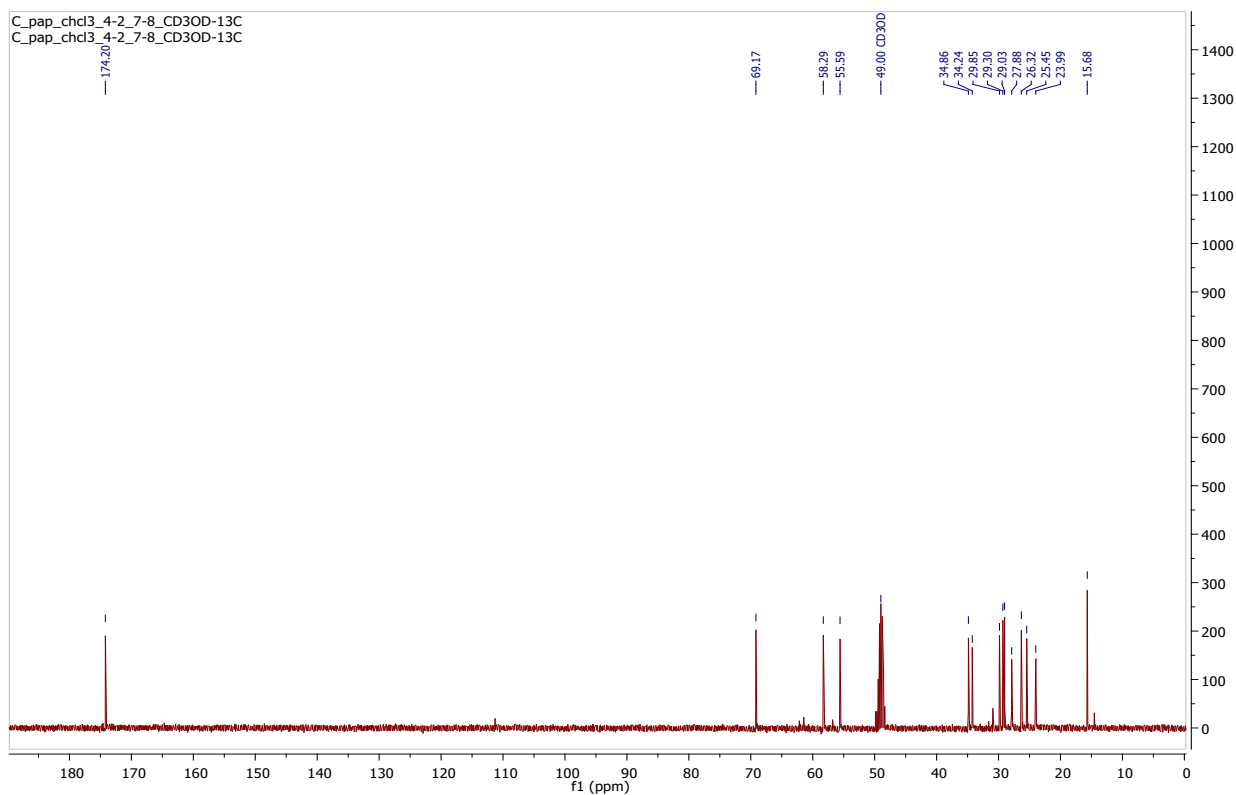

**Fig. S2**  $^{13}\text{C}$ -NMR spectrum of compound **1** (100 MHz,  $\text{CD}_3\text{OD}$ ).

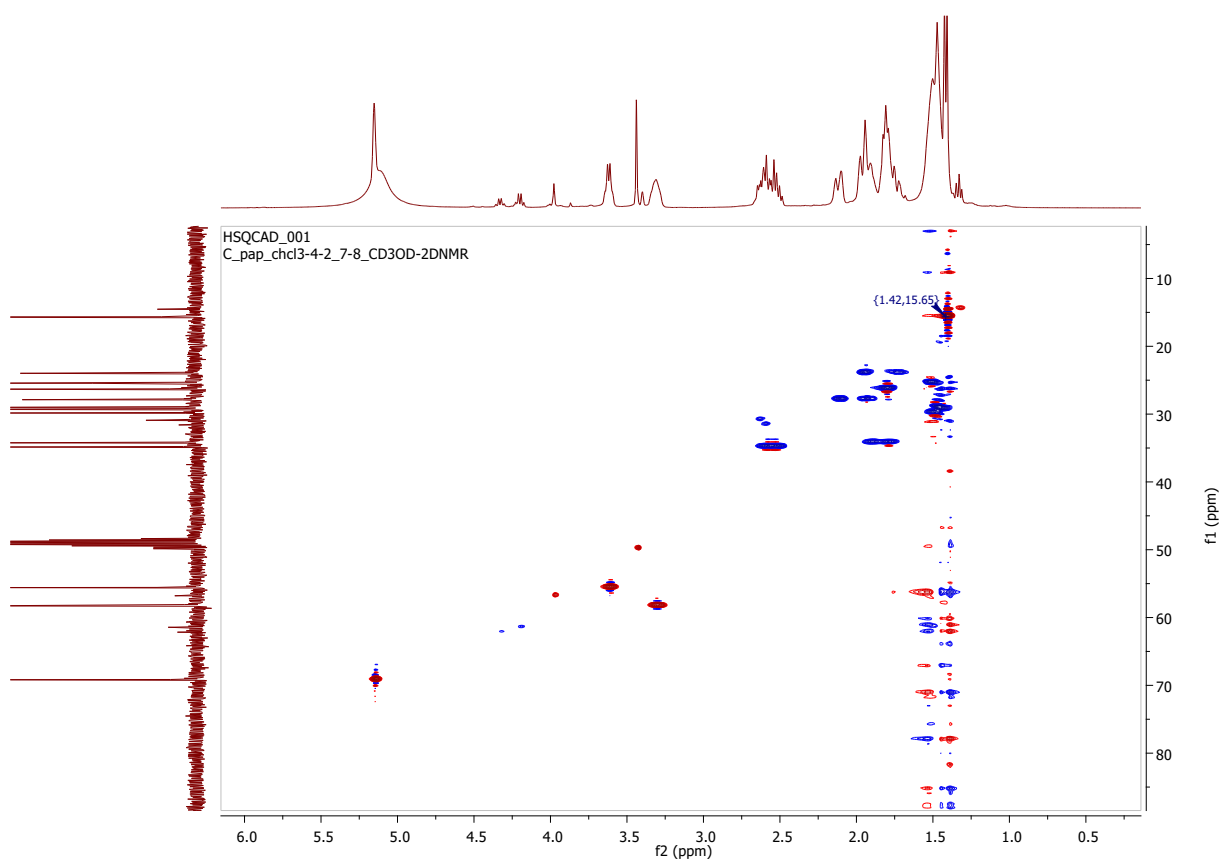

**Fig. S3** HSQC spectrum of compound **1**.

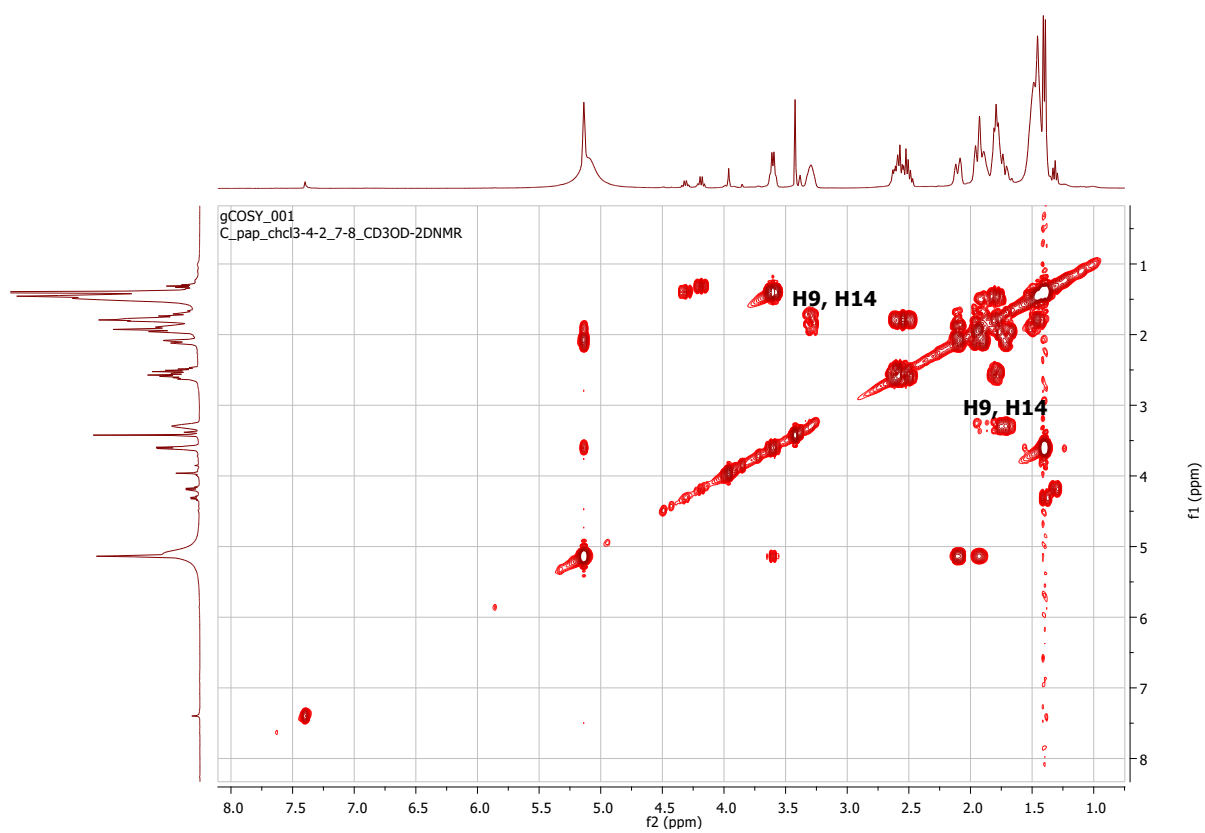

**Fig. S4.**  $^1\text{H}$ - $^1\text{H}$  COSY spectrum of compound **1**.

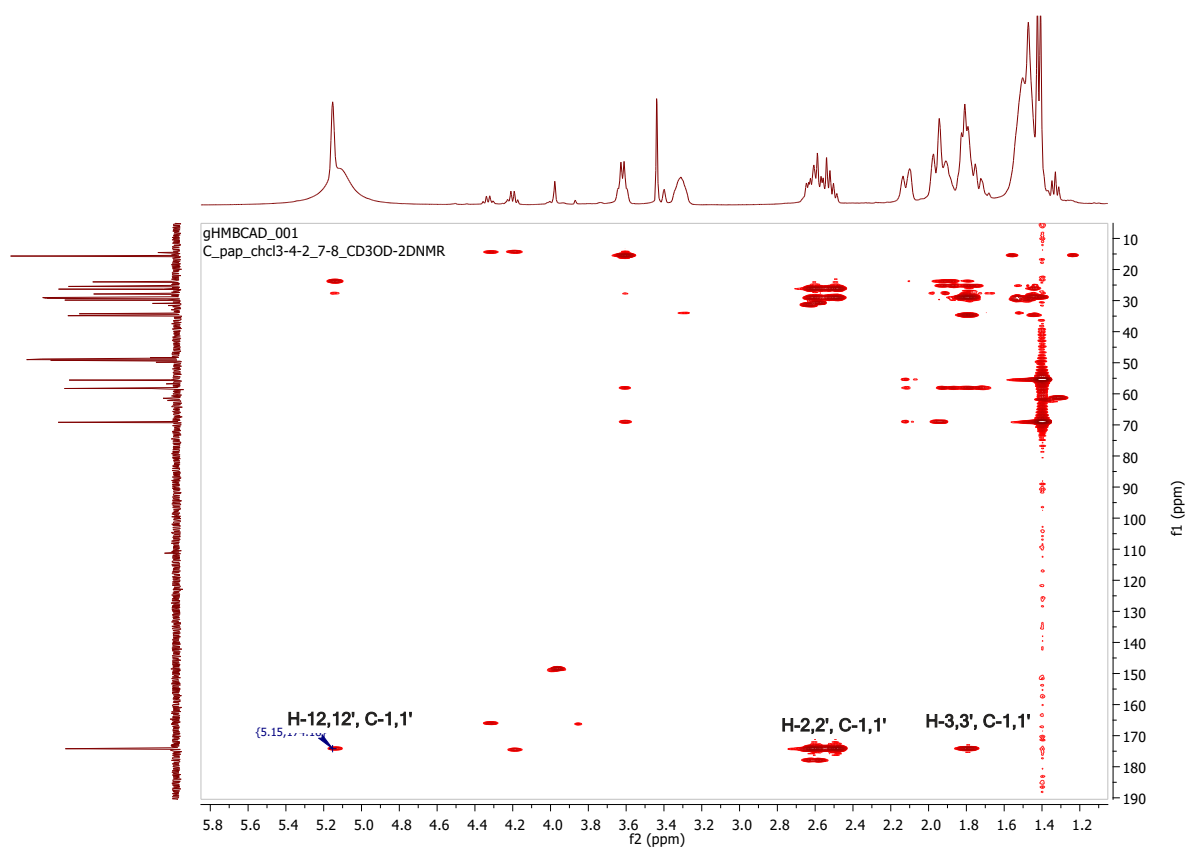

**Fig. S5** HMBC spectrum of compound **1**.

msa188 #45 RT: 0.58 AV: 1 NL: 4.53E8  
T: FTMS + p ESI Full ms [75.00-1100.00]

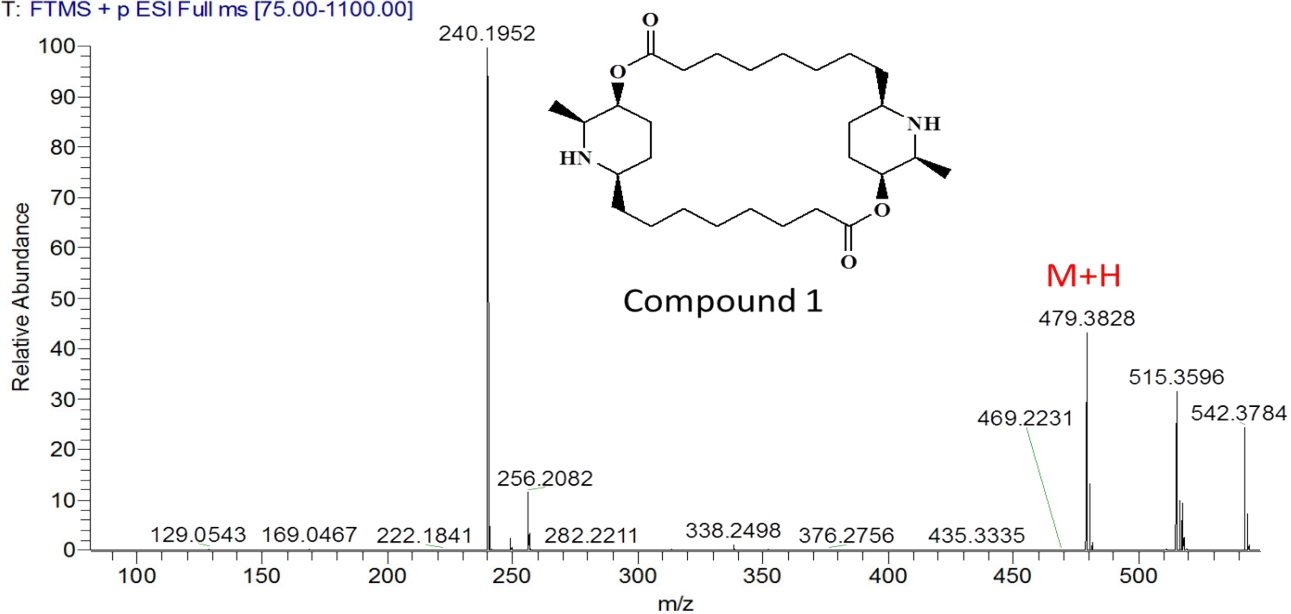

**Fig. S6** Positive HR-ESI-MS spectrum of compound **1**.

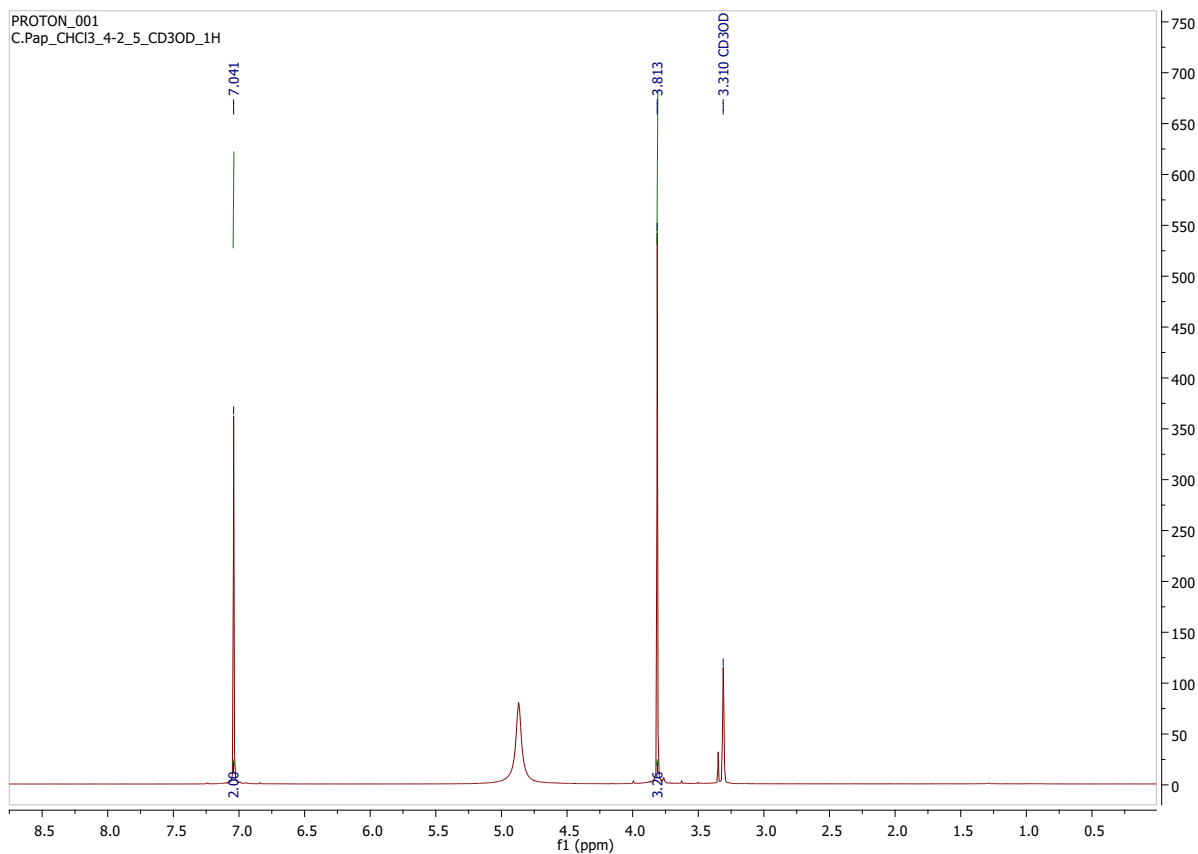

**Fig. S7**  $^1\text{H-NMR}$  spectrum of compound **2** (400 MHz,  $\text{CD}_3\text{OD}$ ).

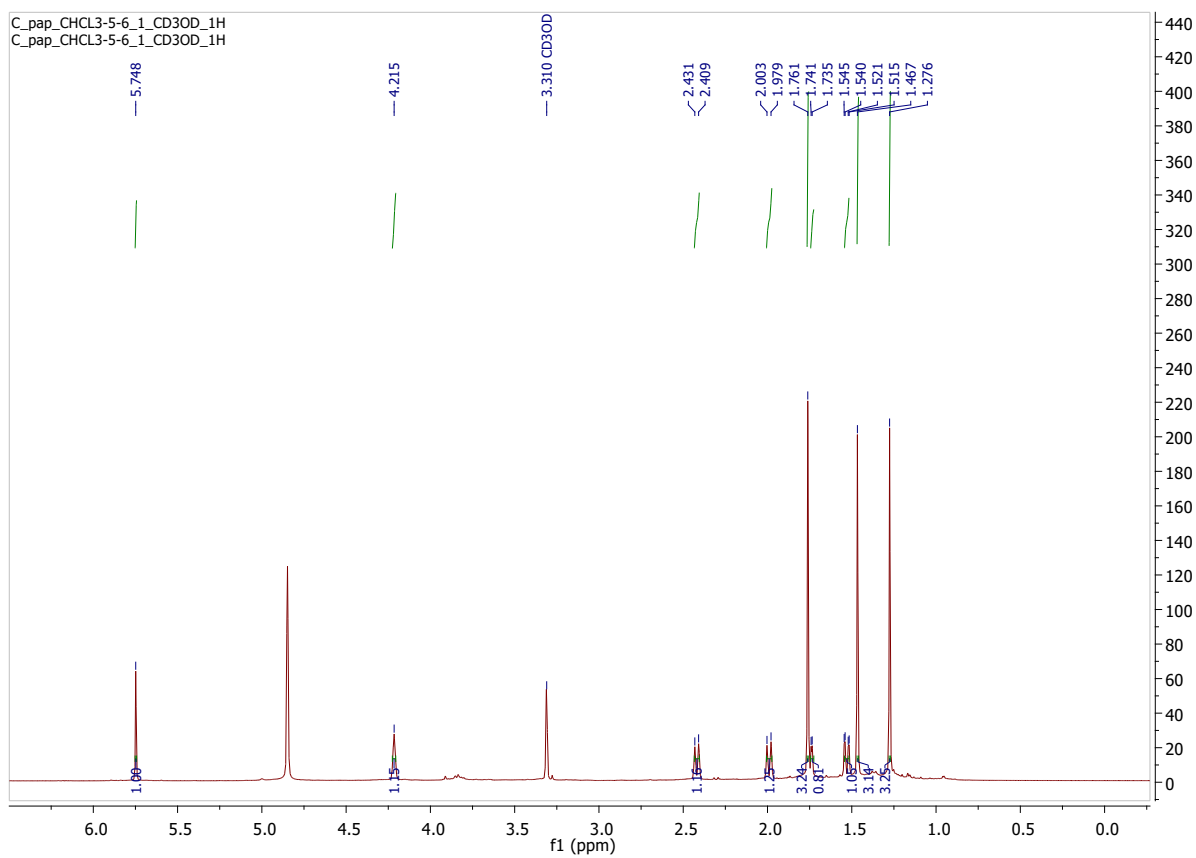

**Fig. S8**  $^1\text{H-NMR}$  spectrum of compound **3** (400 MHz,  $\text{CD}_3\text{OD}$ ).

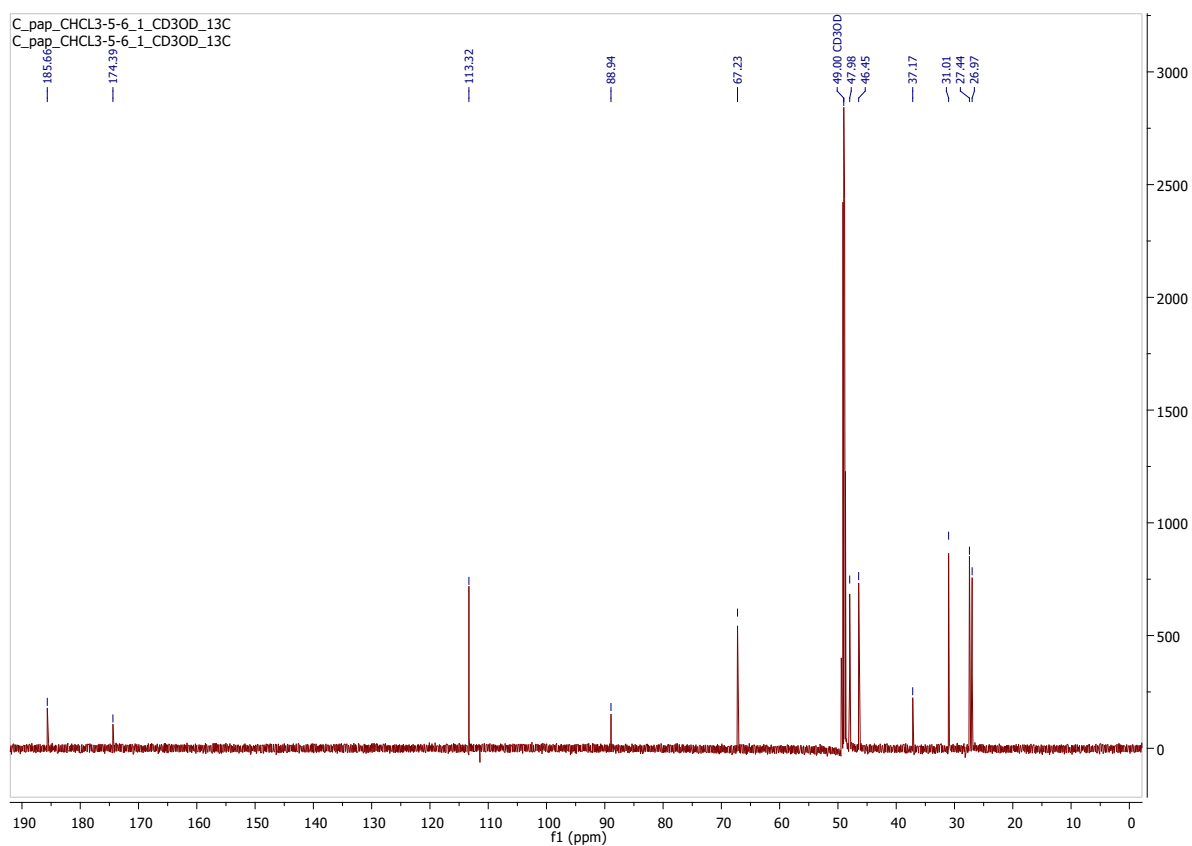

**Fig. S9**  $^{13}\text{C}$ -NMR spectrum of compound **3** (100 MHz,  $\text{CD}_3\text{OD}$ ).

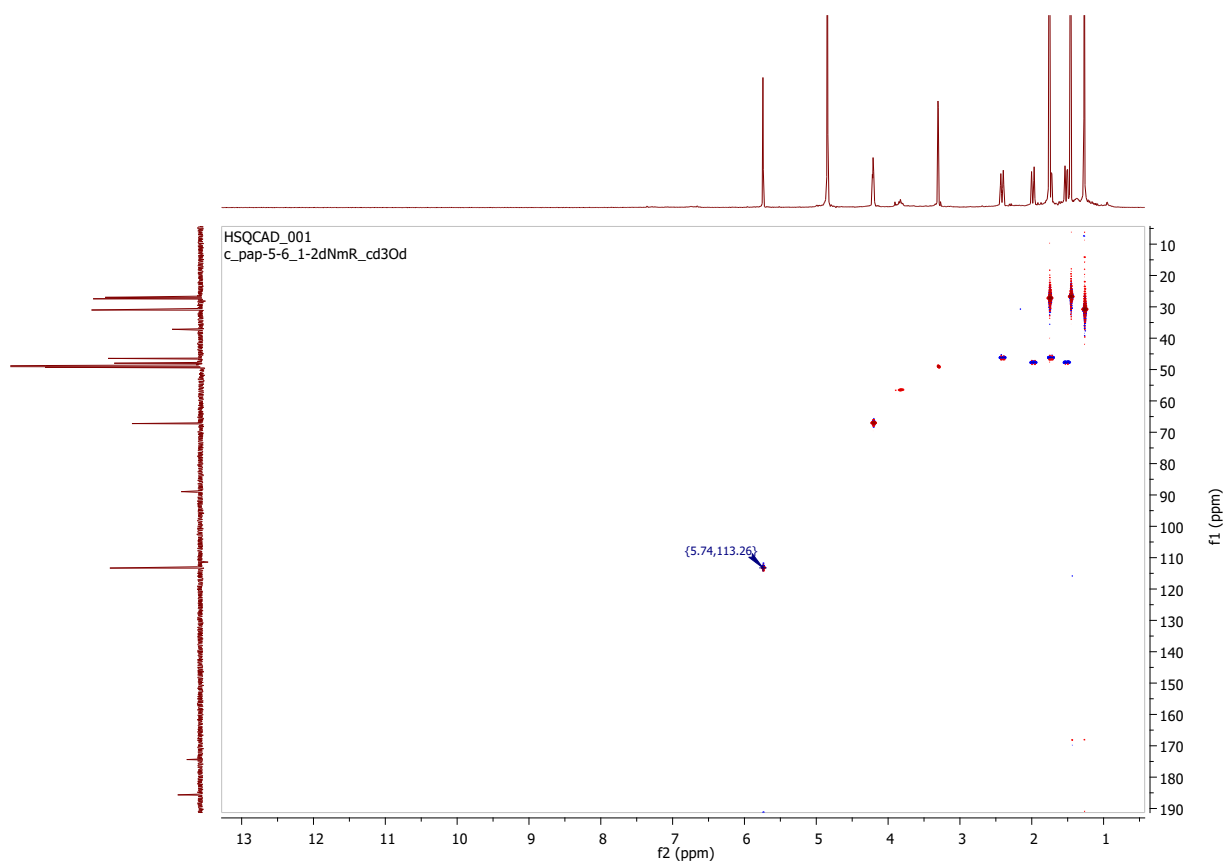

**Fig. S10** HSQC spectrum of compound **3**.



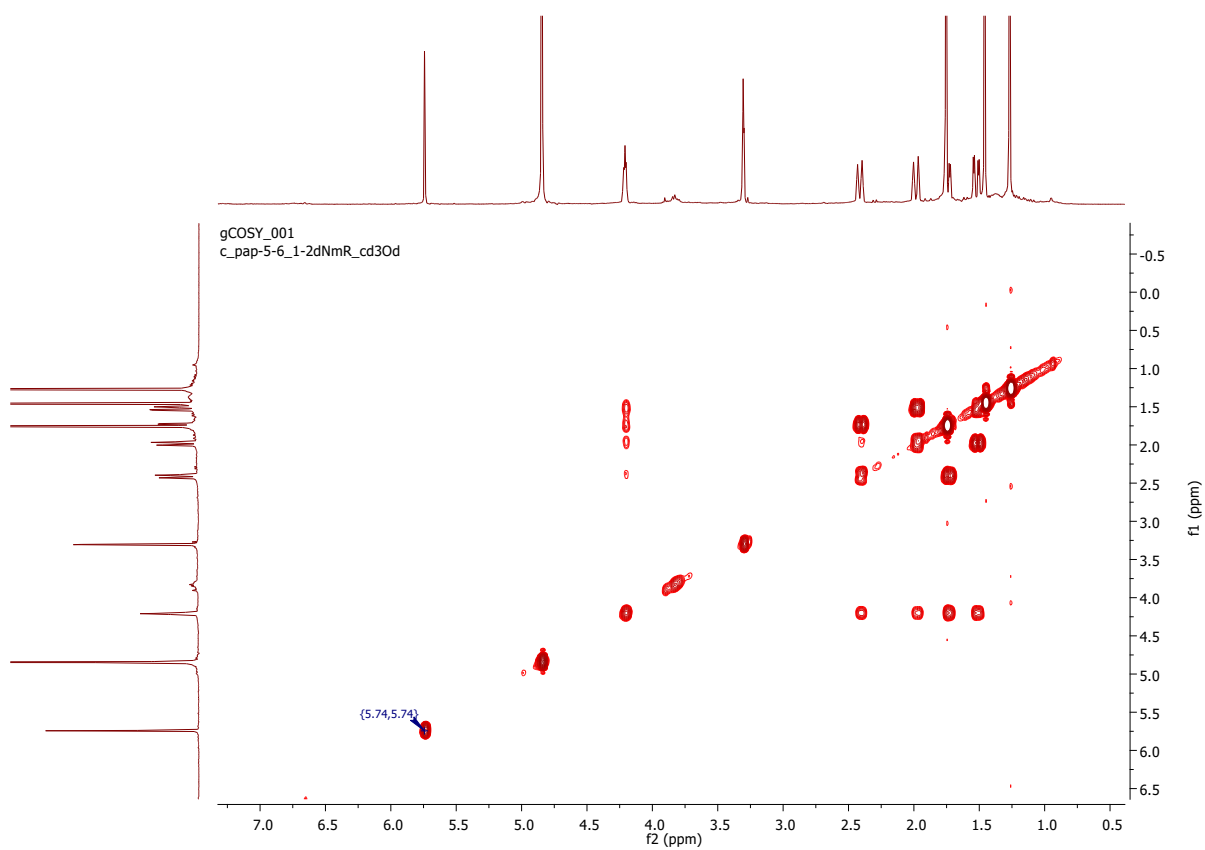

**Fig. S11.**  $^1\text{H}$ - $^1\text{H}$  COSY spectrum of compound **3**.

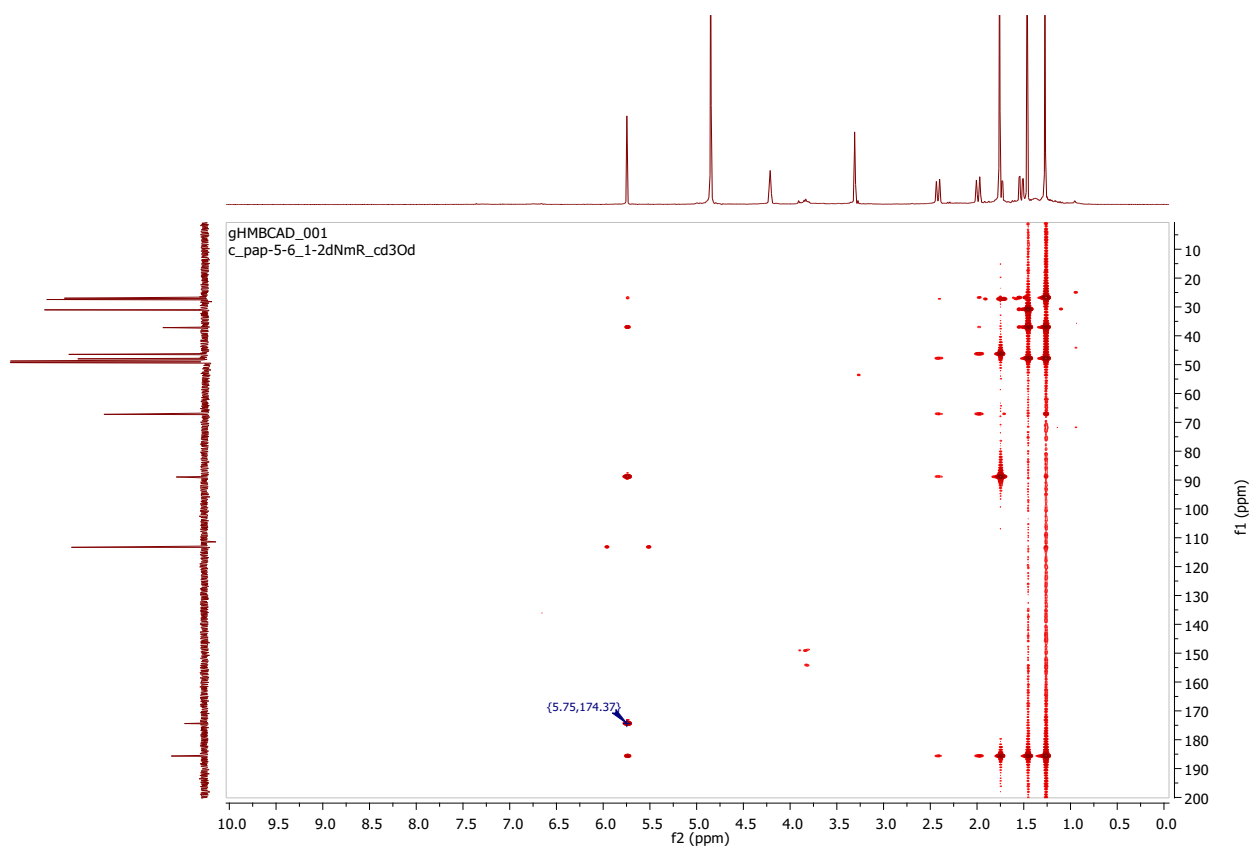

**Fig. S12** HMBC spectrum of compound **3**.

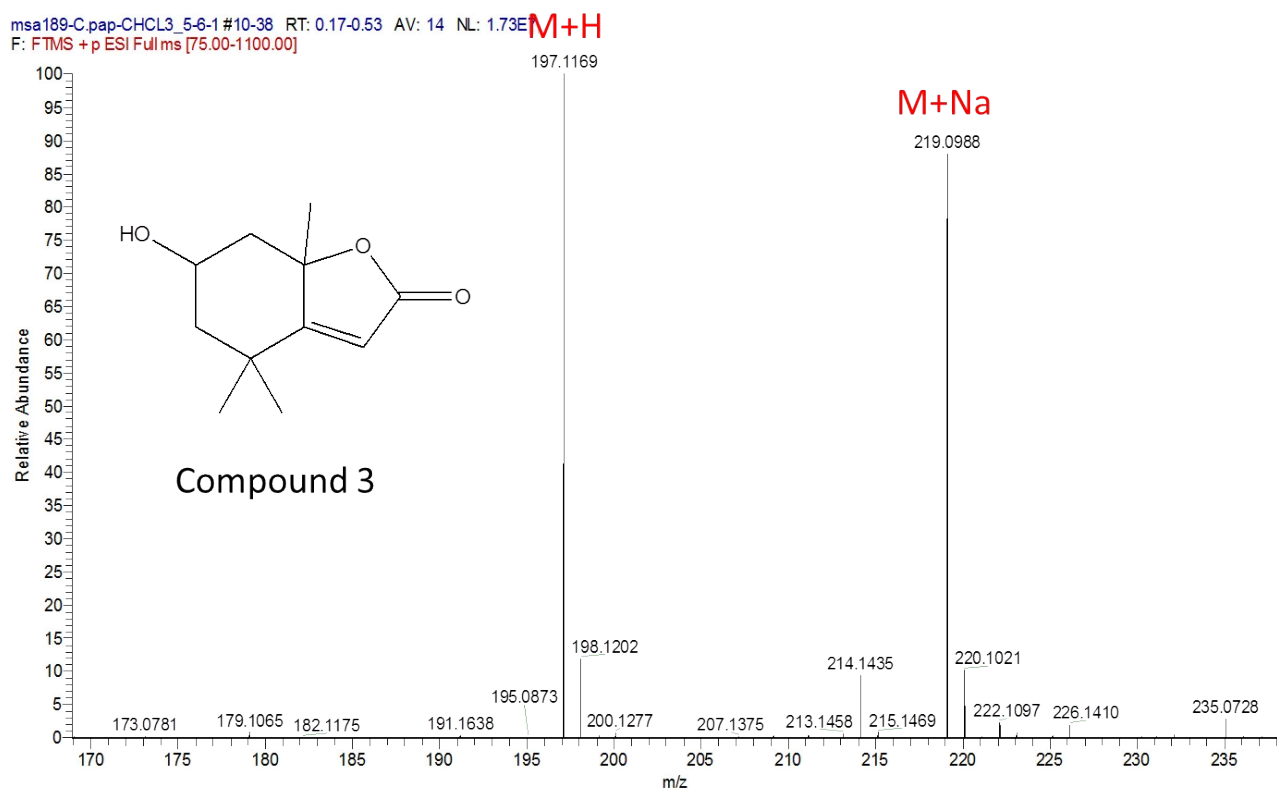

**Fig. S13** Positive HR-ESI-MS spectrum of compound **3**.

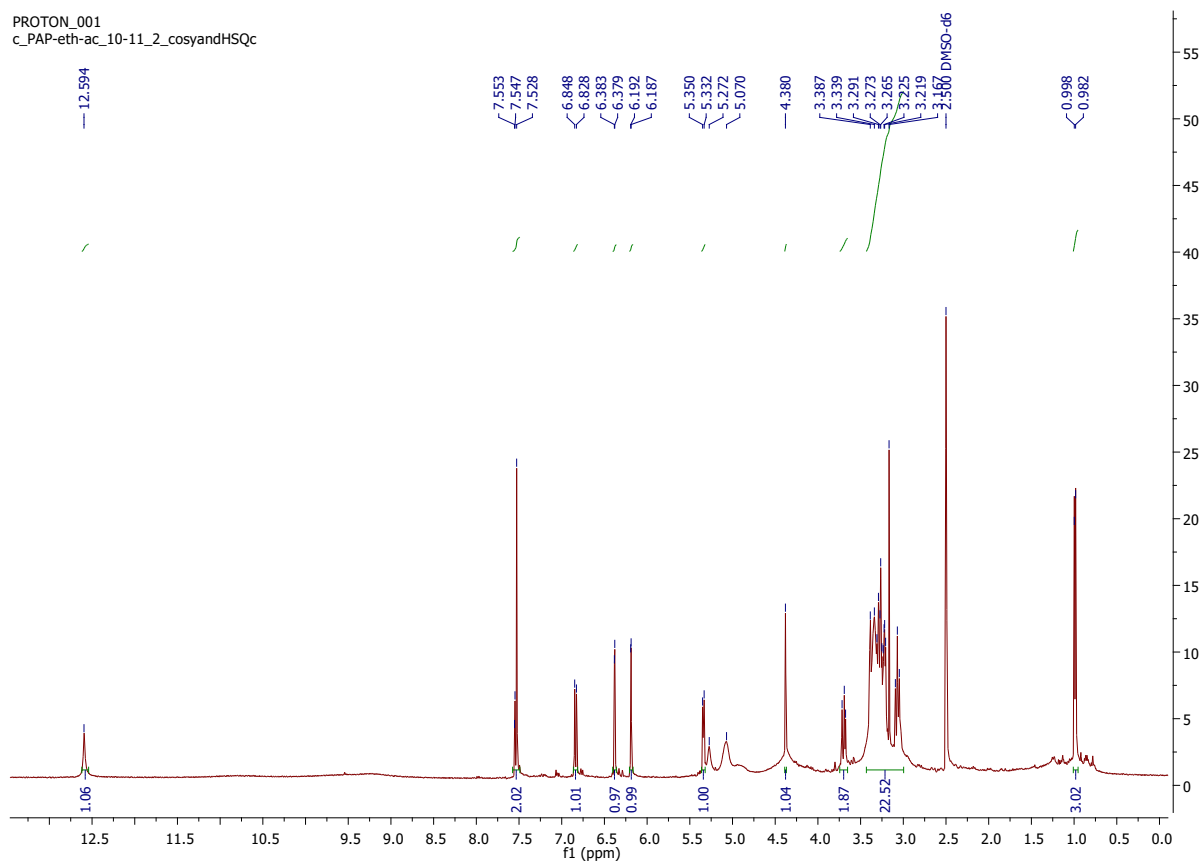

**Fig. S14.**  $^1\text{H-NMR}$  spectrum of compound **4** (400 MHz,  $\text{DMSO-}d_6$ ).

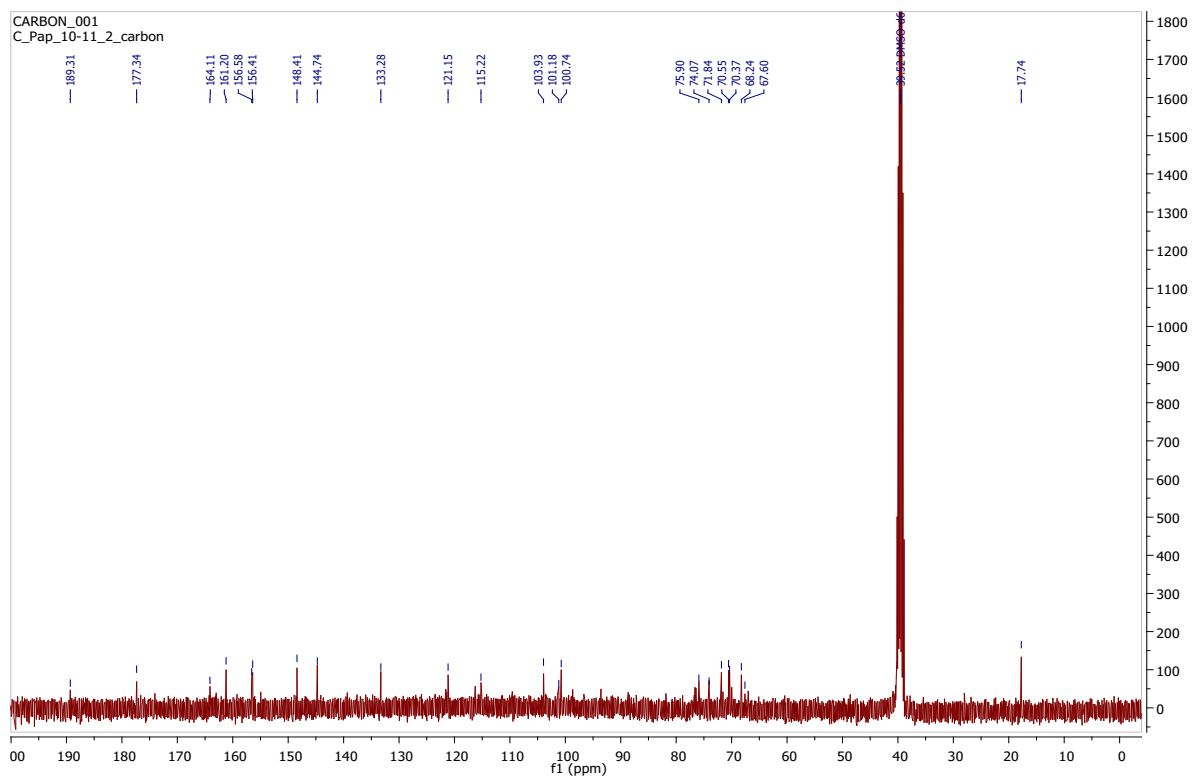

**Fig. S15.**  $^{13}\text{C-NMR}$  spectrum of compound **4** (100 MHz,  $\text{DMSO-}d_6$ ).

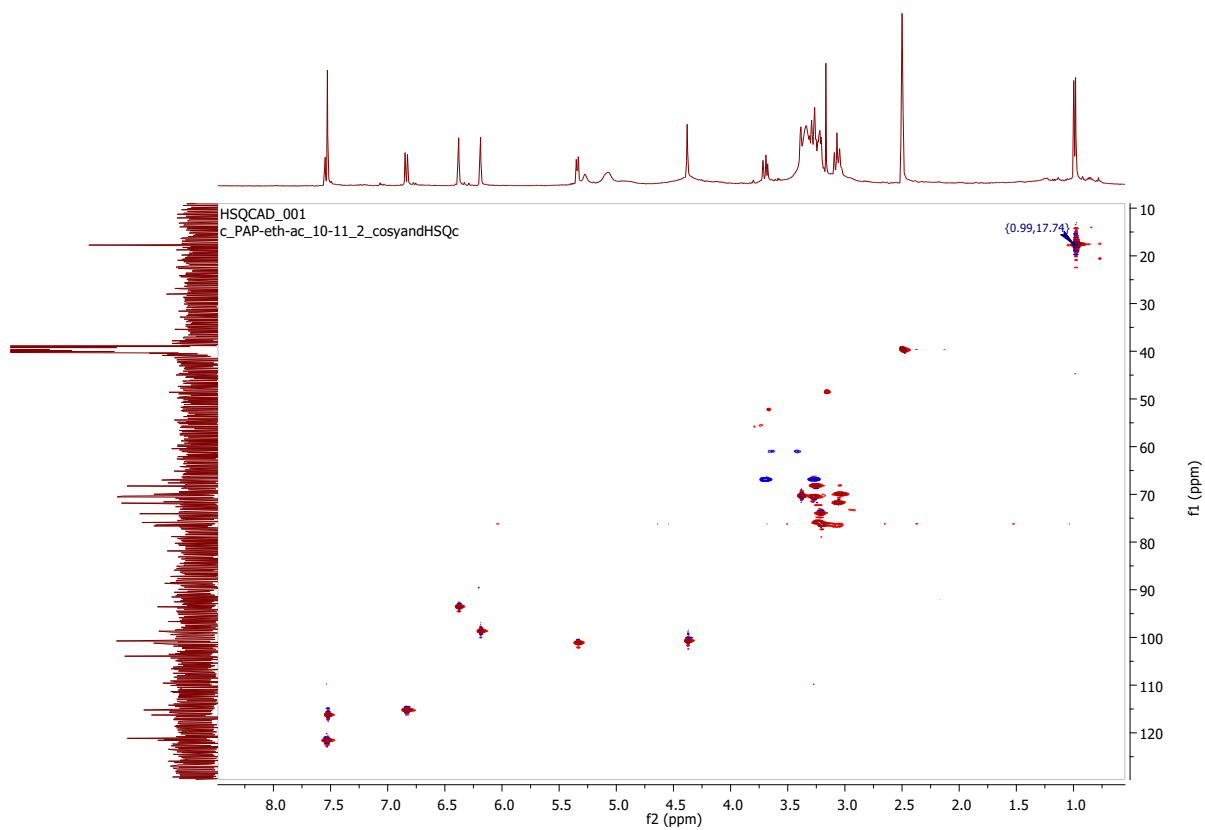

Fig. S16 HSQC spectrum of compound 4.

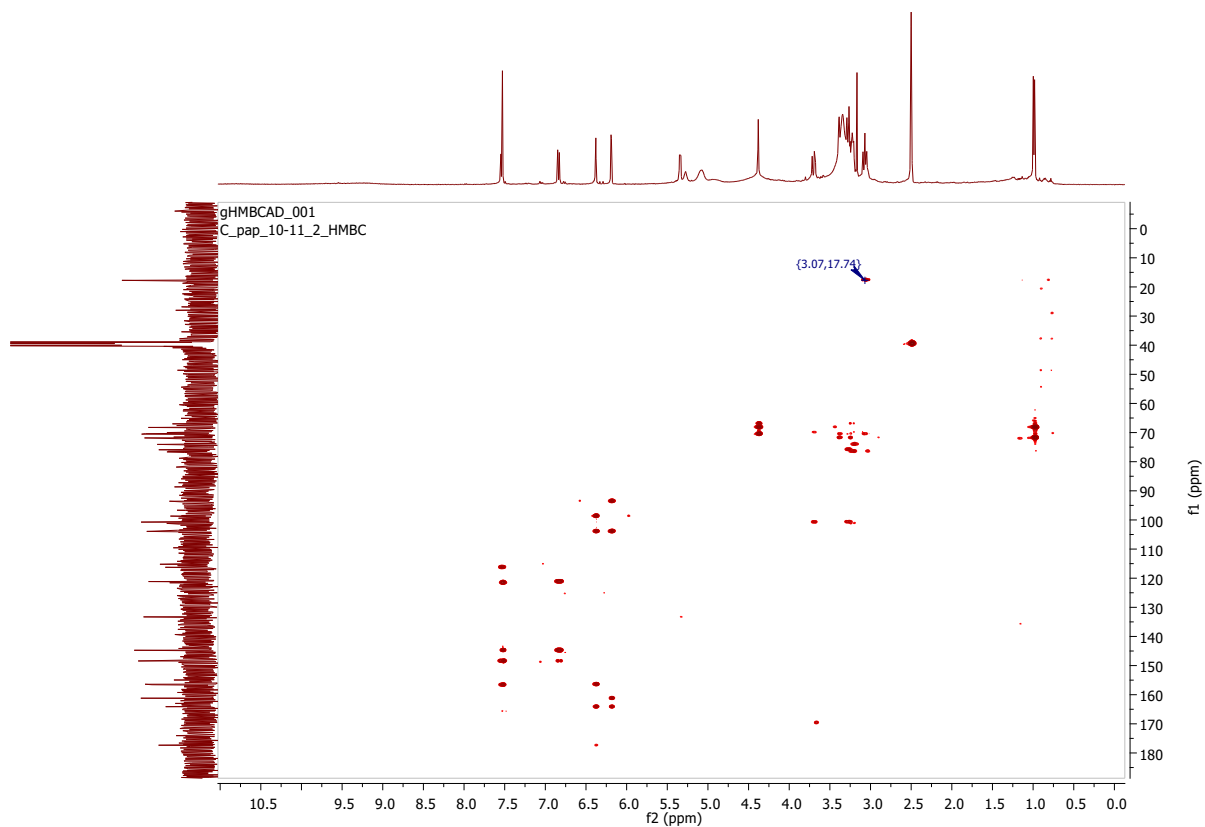

Fig. S17 HMBC spectrum of compound 4.

MSA155 #353 RT: 5.74 AV: 1 NL: 2.26E6  
F: FTMS + p ESI Full ms [100.00-2000.00]

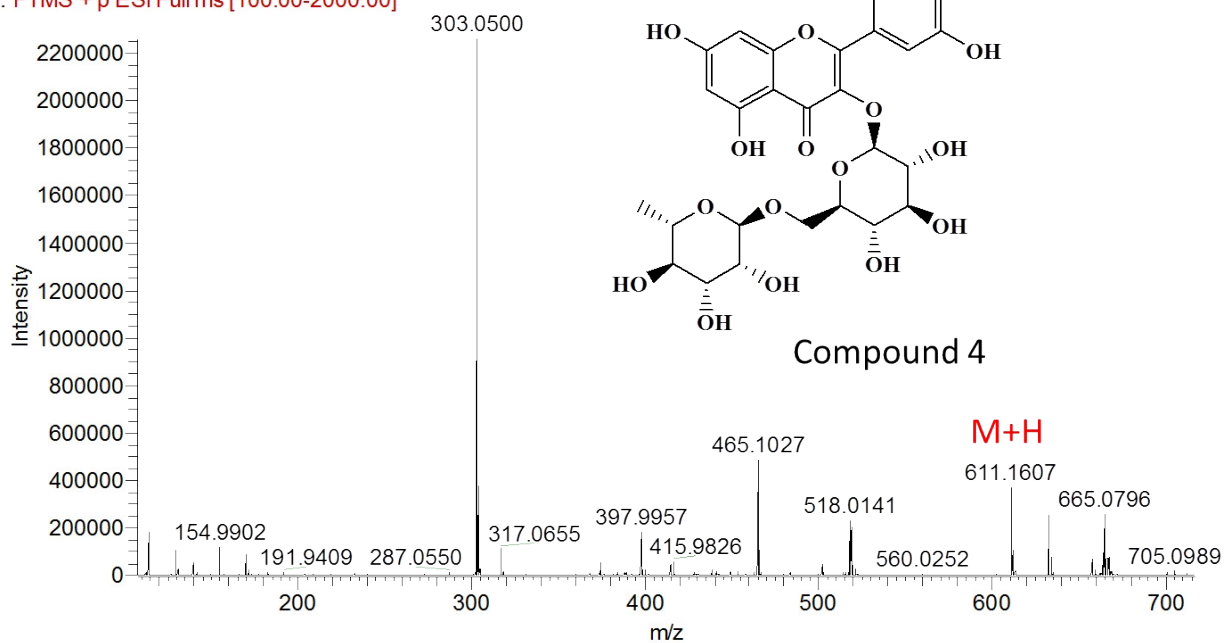

**Fig. S18** Positive HR-ESI-MS spectrum of compound **4**.

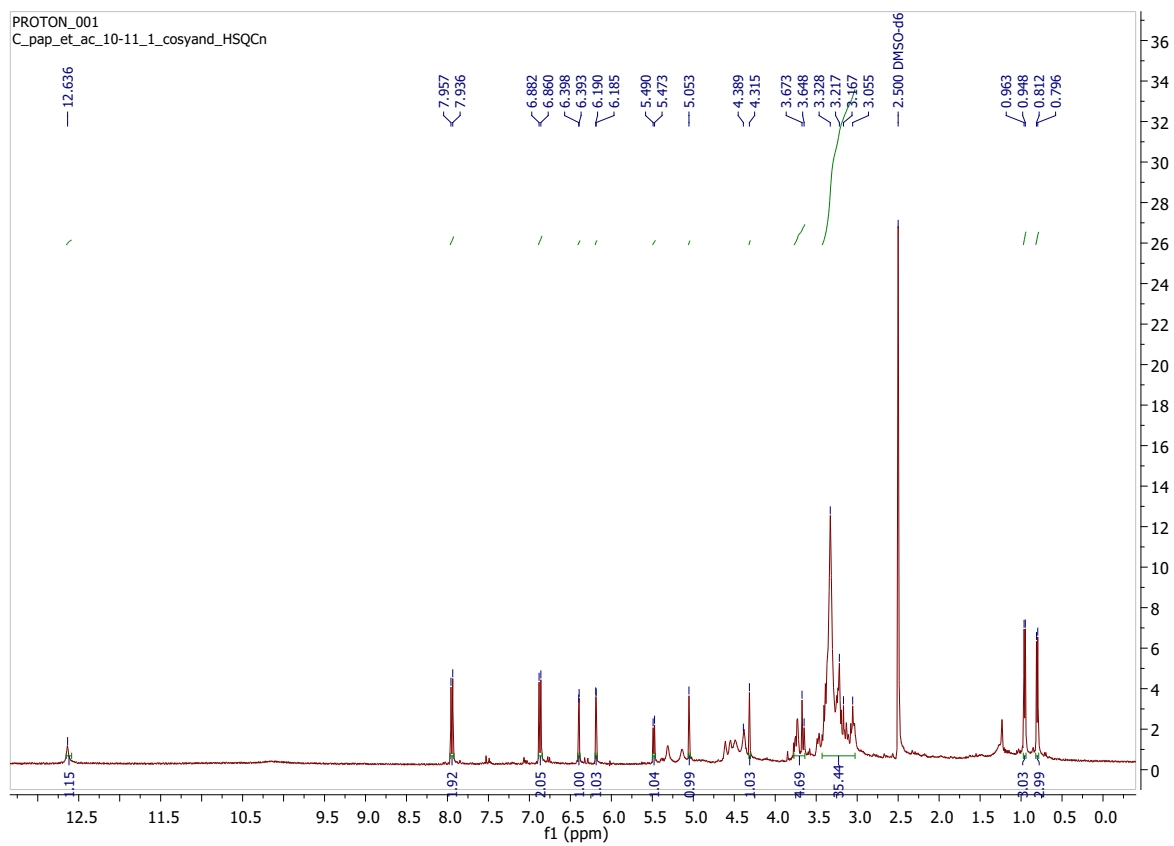

**Fig. S19**  $^1\text{H-NMR}$  spectrum of compound **5** (400 MHz,  $\text{DMSO-}d_6$ ).

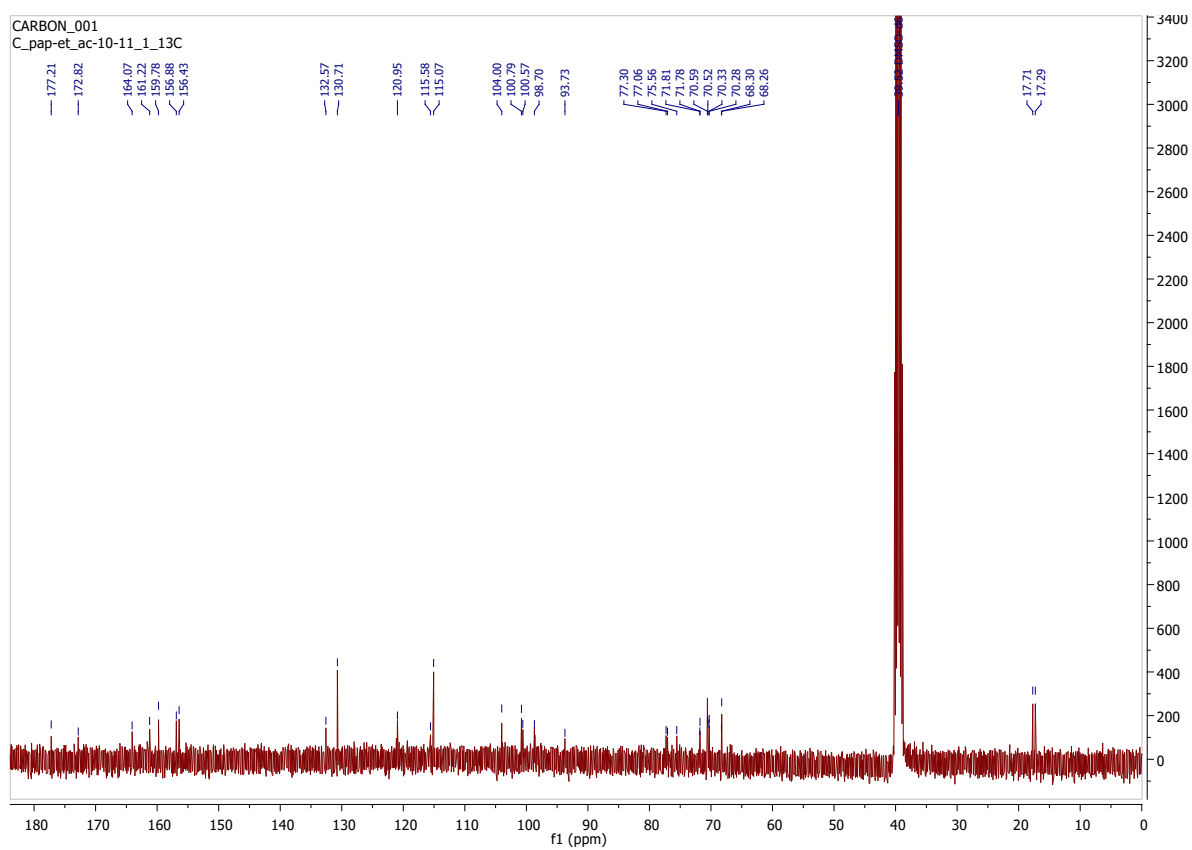

**Fig. S20**  $^{13}\text{C}$ -NMR spectrum of compound **5** (100 MHz,  $\text{DMSO-}d_6$ ).

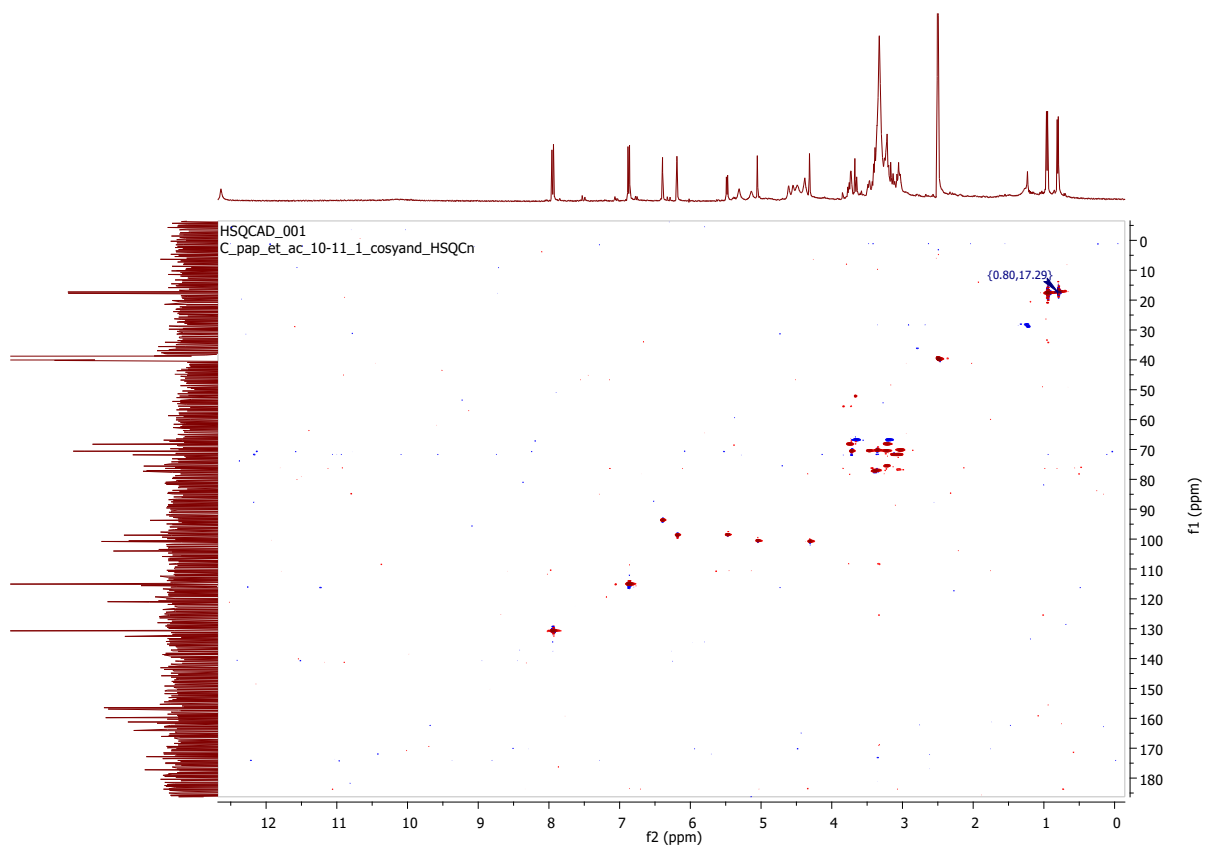

**Fig. S21** HSQC spectrum of compound **5**.

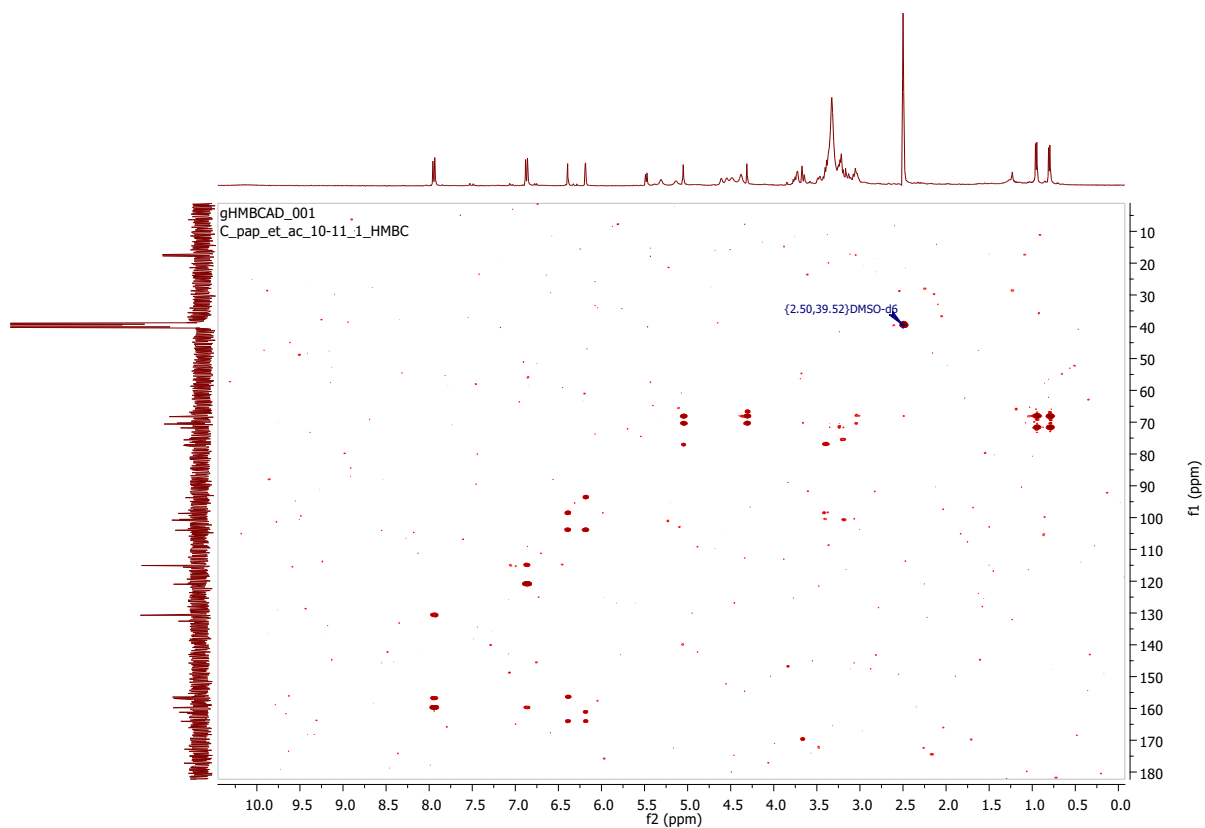

**Fig. S22** HMBC spectrum of compound **5**.

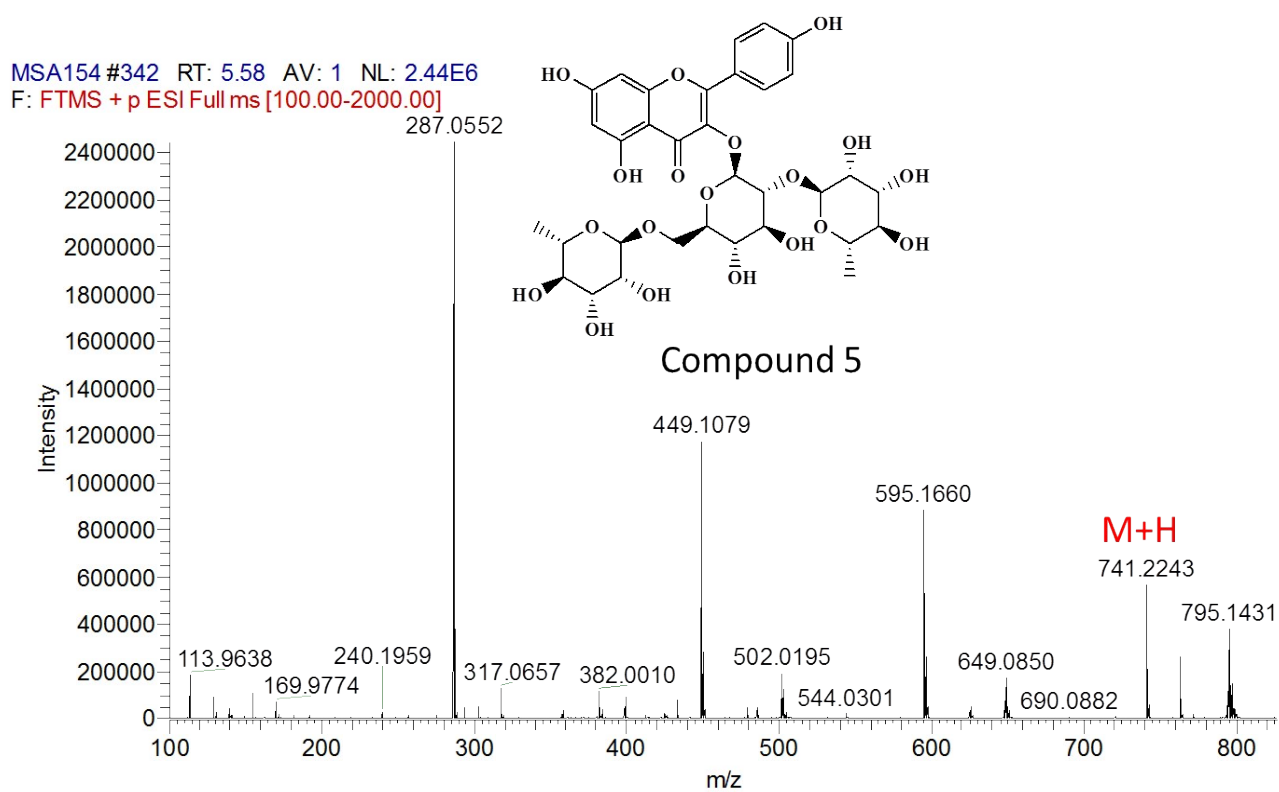

**Fig. S23** Positive HR-ESI-MS spectrum of compound **5**.

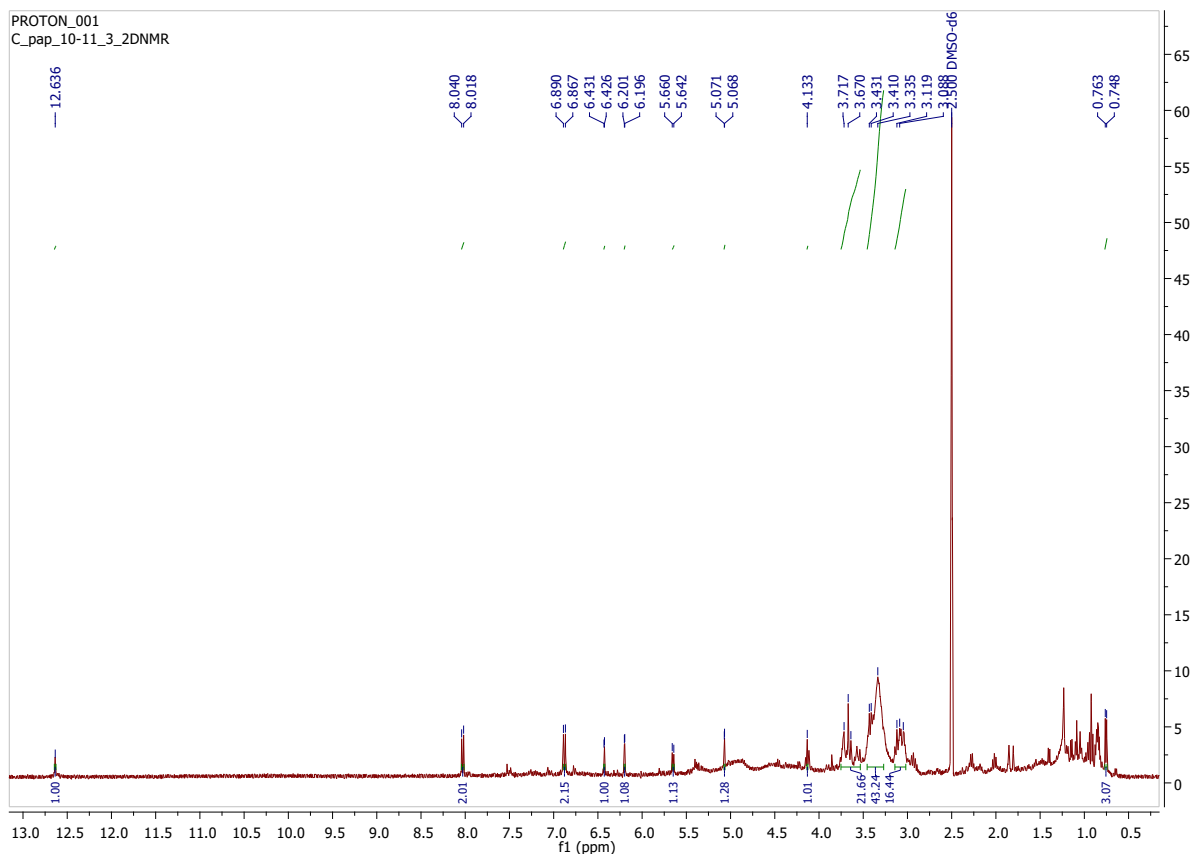

**Fig. S24**  $^1\text{H-NMR}$  spectrum of compound **6** (400 MHz,  $\text{DMSO-}d_6$ ).

MSA156 #381 RT: 6.18 AV: 1 NL: 2.67E6  
F: FTMS + p ESI Full ms [100.00-2000.00]

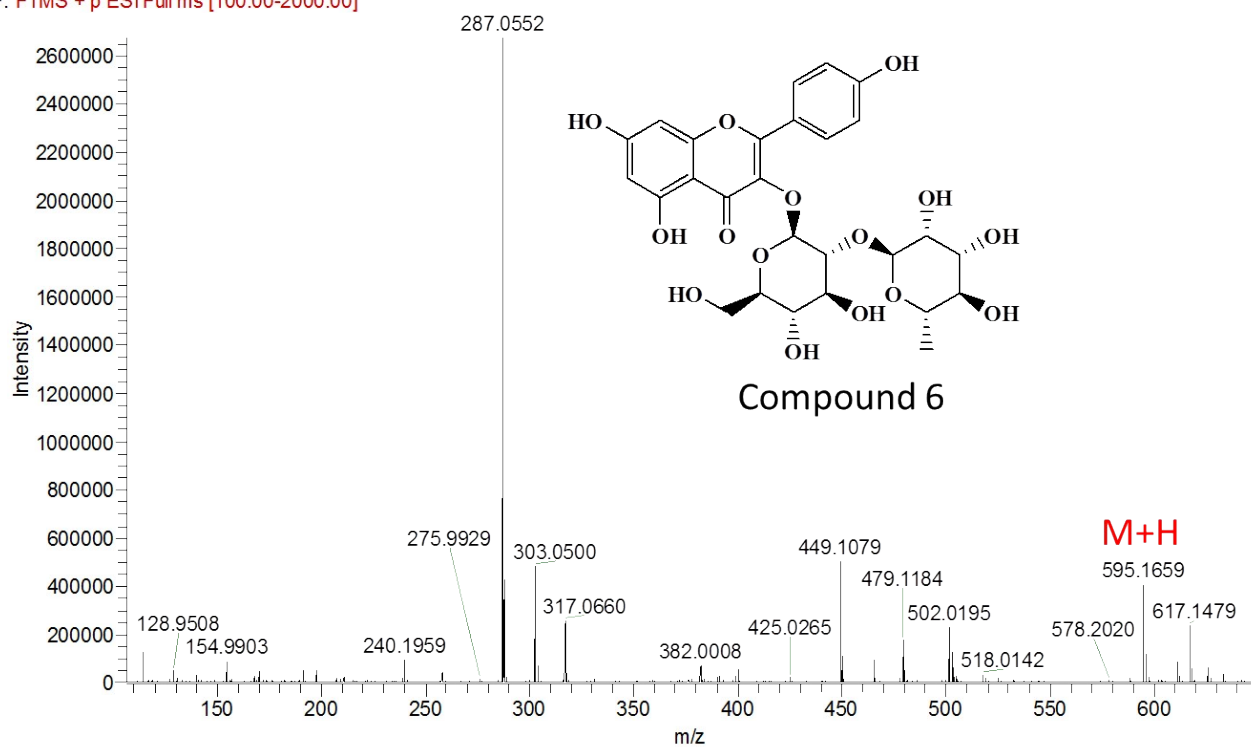

**Fig. S25** Positive HR-ESI-MS spectrum of compound **6**.



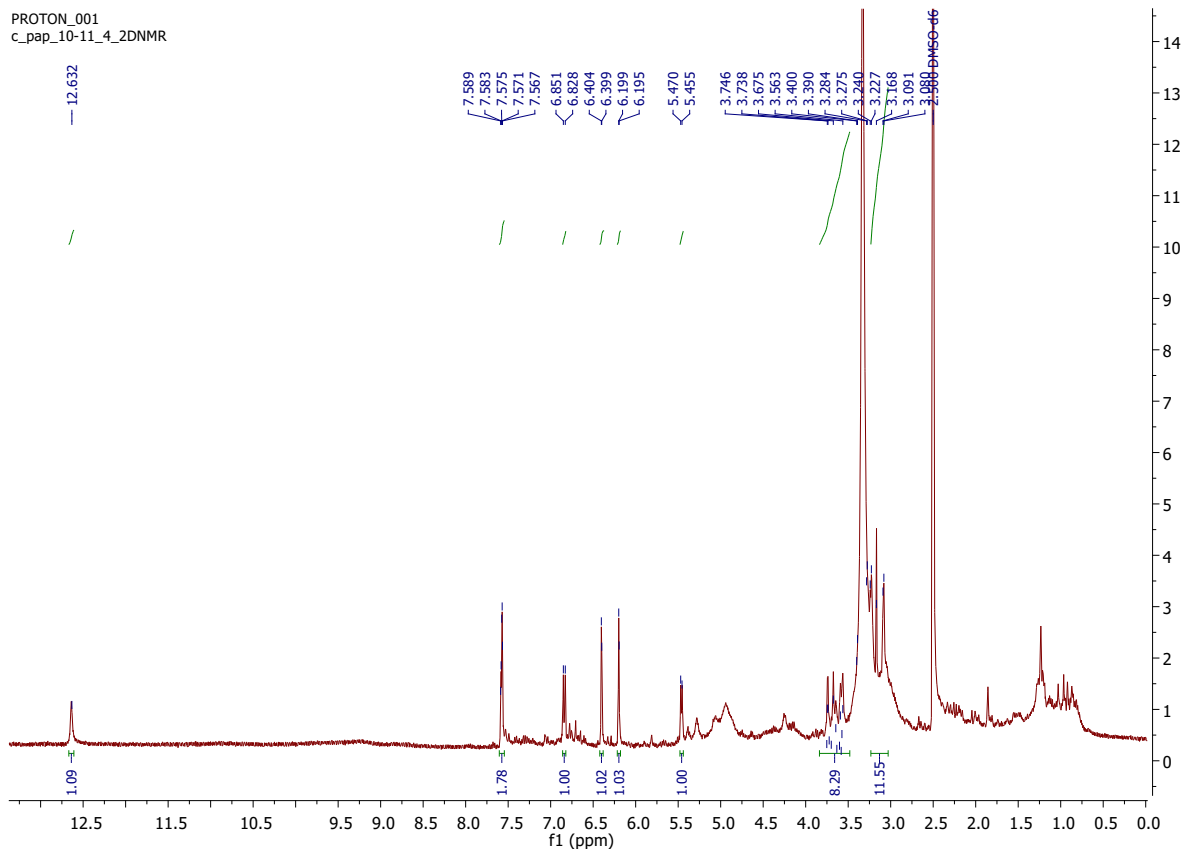

**Fig. S26**  $^1\text{H-NMR}$  spectrum of compound **7** (400 MHz,  $\text{DMSO-d}_6$ ).

MSA157 #375 RT: 5.98 AV: 1 NL: 1.40E6  
F: FTMS + p ESI Full ms [100.00-2000.00]

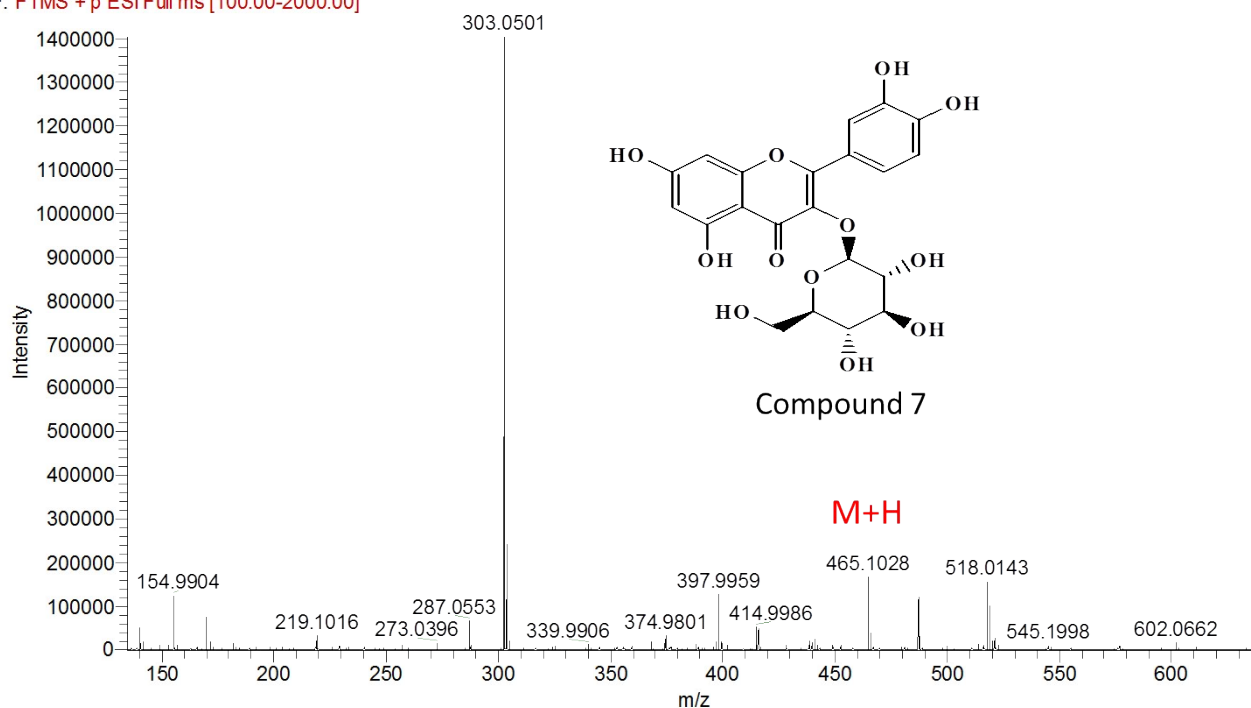

**Fig. S27** Positive HR-ESI-MS spectrum of compound **7**.

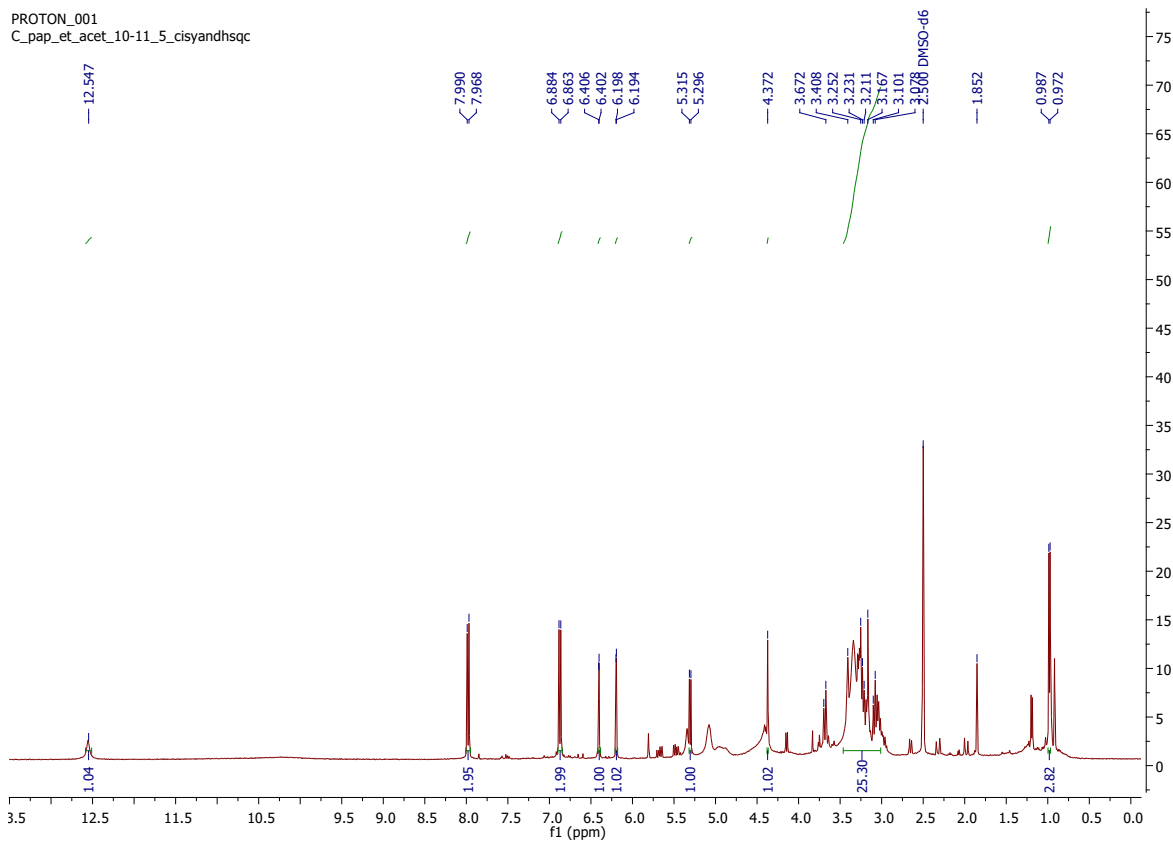

**Fig. S28**  $^1\text{H-NMR}$  spectrum of compound **8** (400 MHz,  $\text{DMSO-d}_6$ ).

MSA158 #384 RT: 6.20 AV: 1 NL: 3.47E6  
F: FTMS + p ESI Full ms [100.00-2000.00]

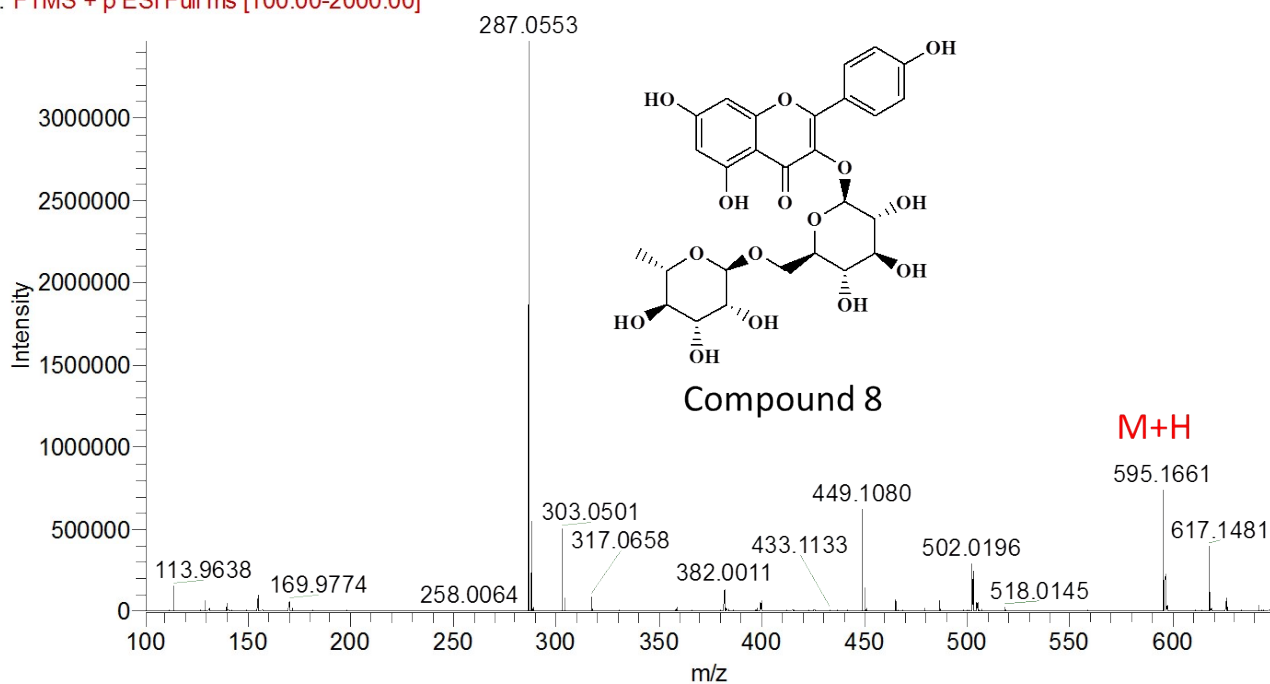

**Fig. S29** Positive HR-ESI-MS spectrum of compound **8**.

PROTON\_001  
c\_pap\_10-11\_7\_HSQC

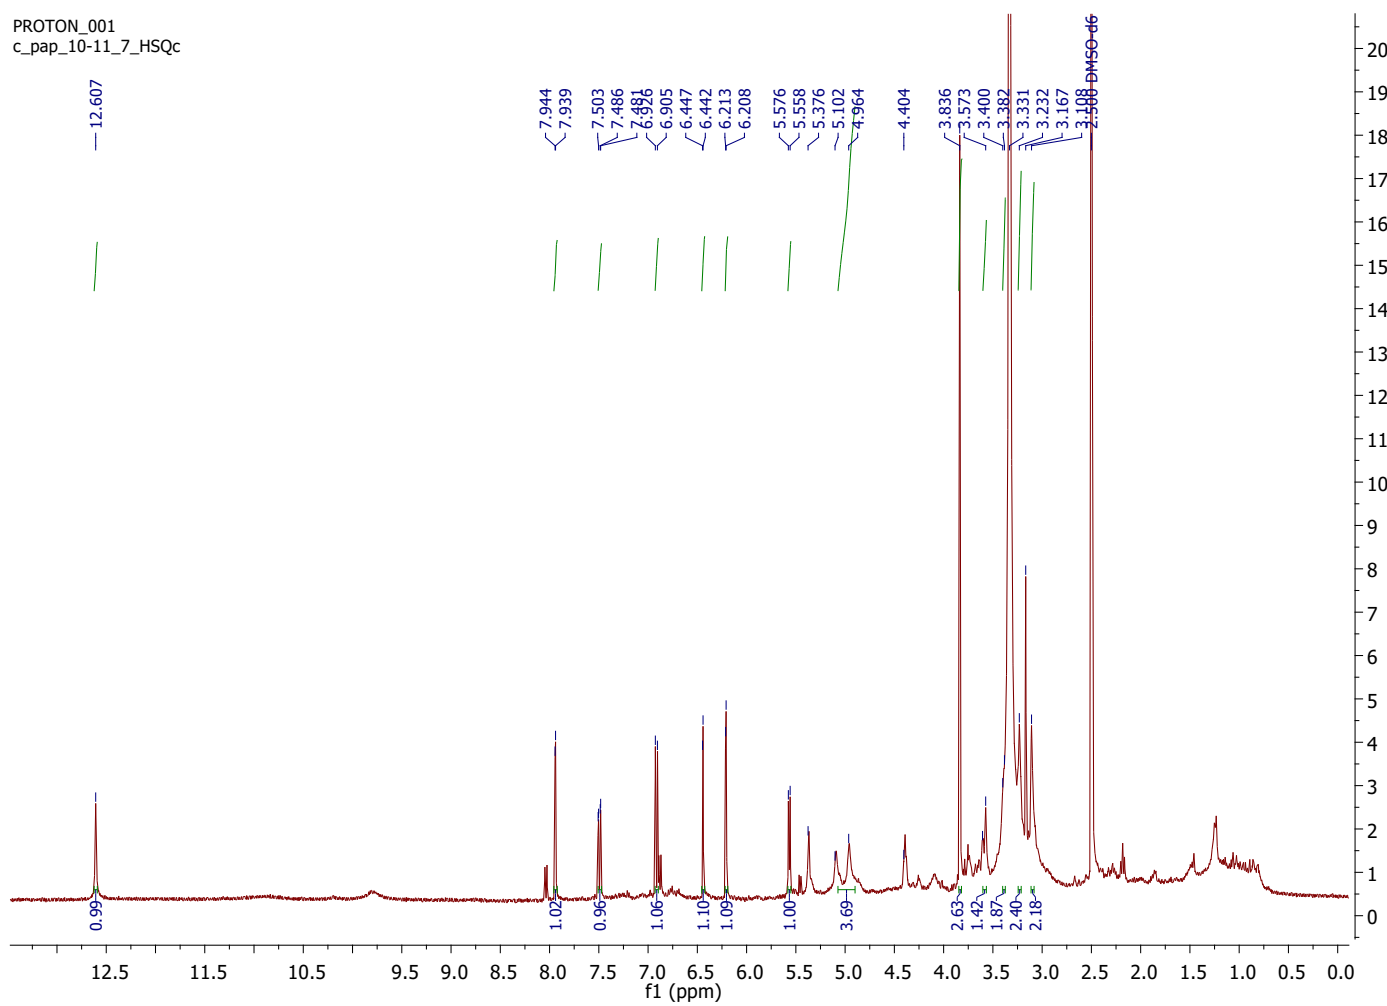

**Fig. S30**  $^1\text{H-NMR}$  spectrum of compound **9** (400 MHz,  $\text{DMSO-}d_6$ ).

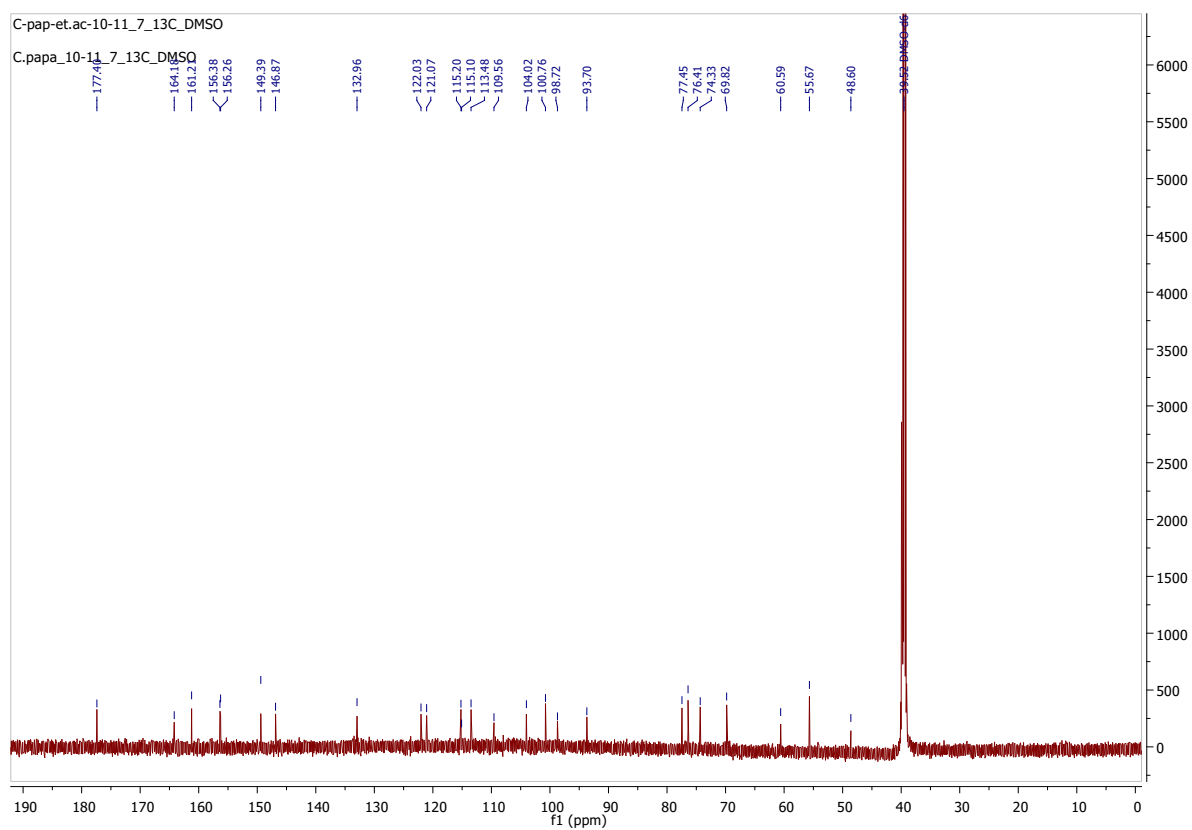

Fig. S31  $^{13}\text{C}$ -NMR spectrum of compound **9** (100 MHz,  $\text{DMSO-}d_6$ ).

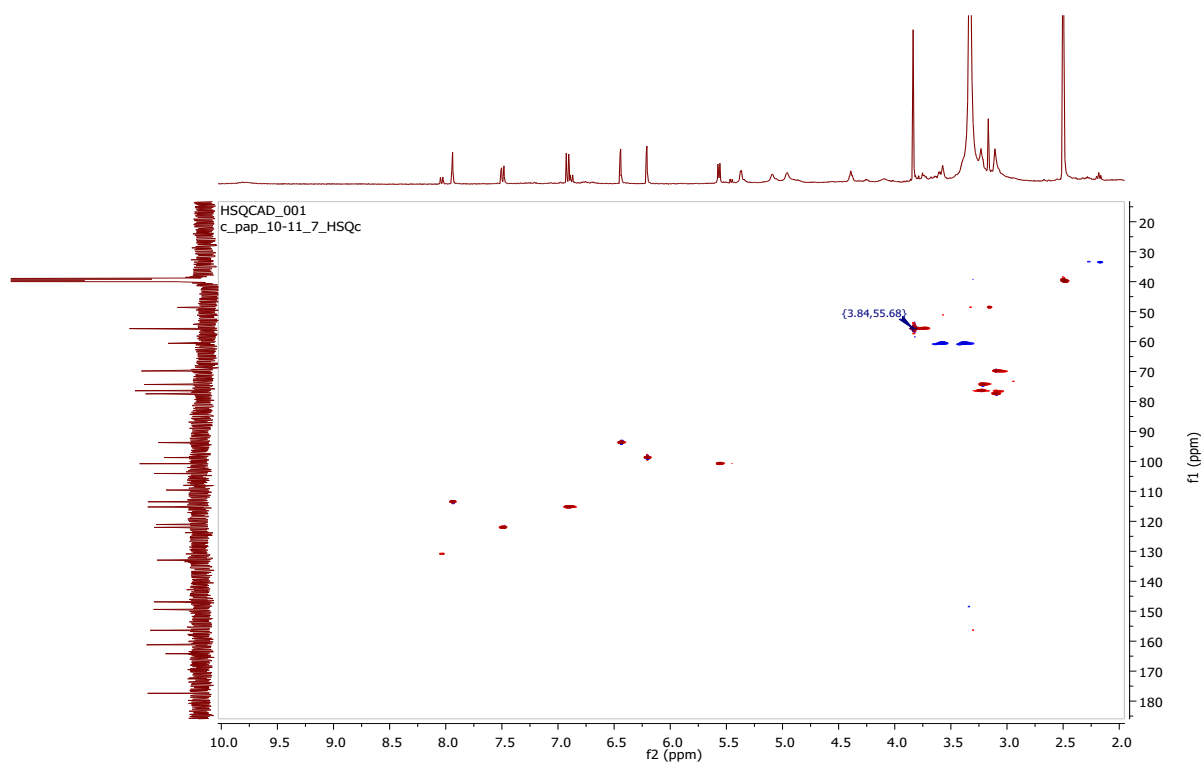

Fig. S32 HSQC spectrum of compound **9**.

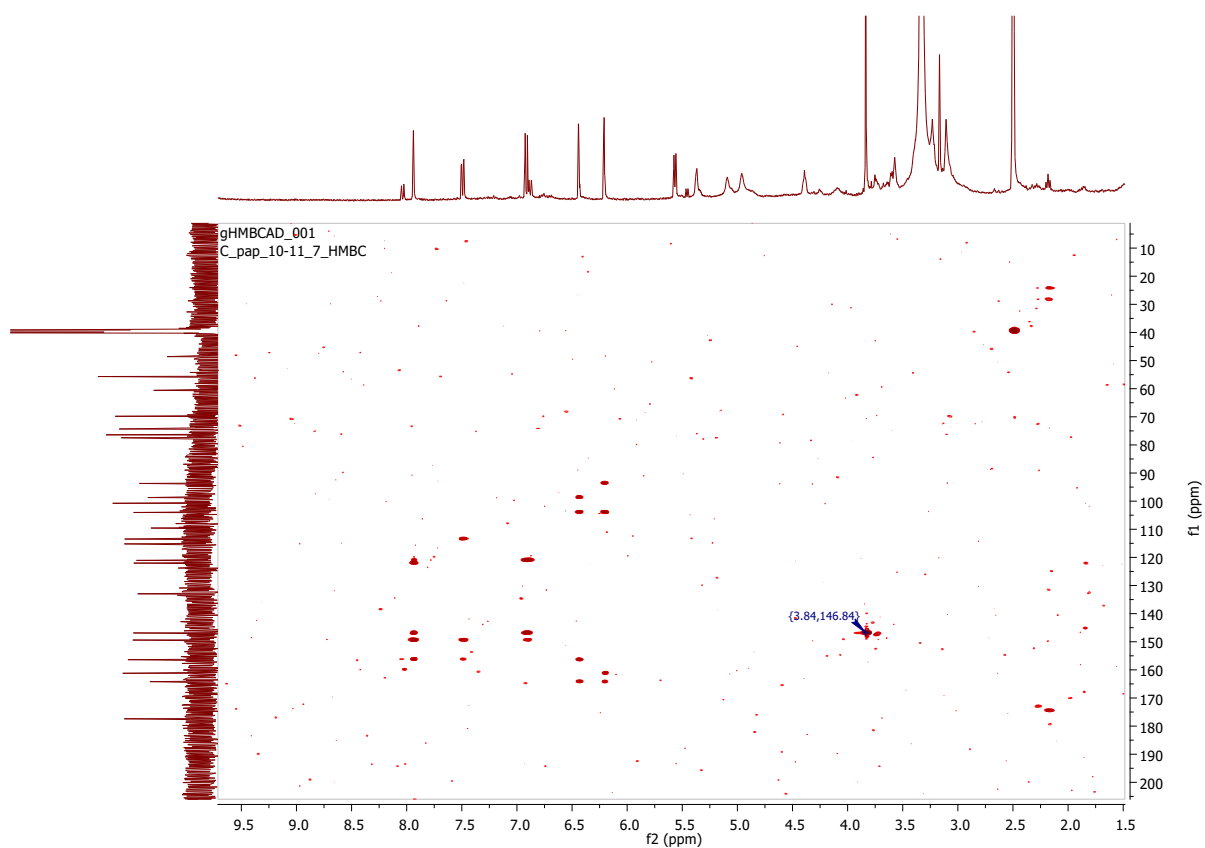

**Fig. S33** HMBC spectrum of compound **9**.

MSA160 #410 RT: 6.58 AV: 1 NL: 3.62E6  
F: FTMS + p ESI Full ms [100.00-2000.00]

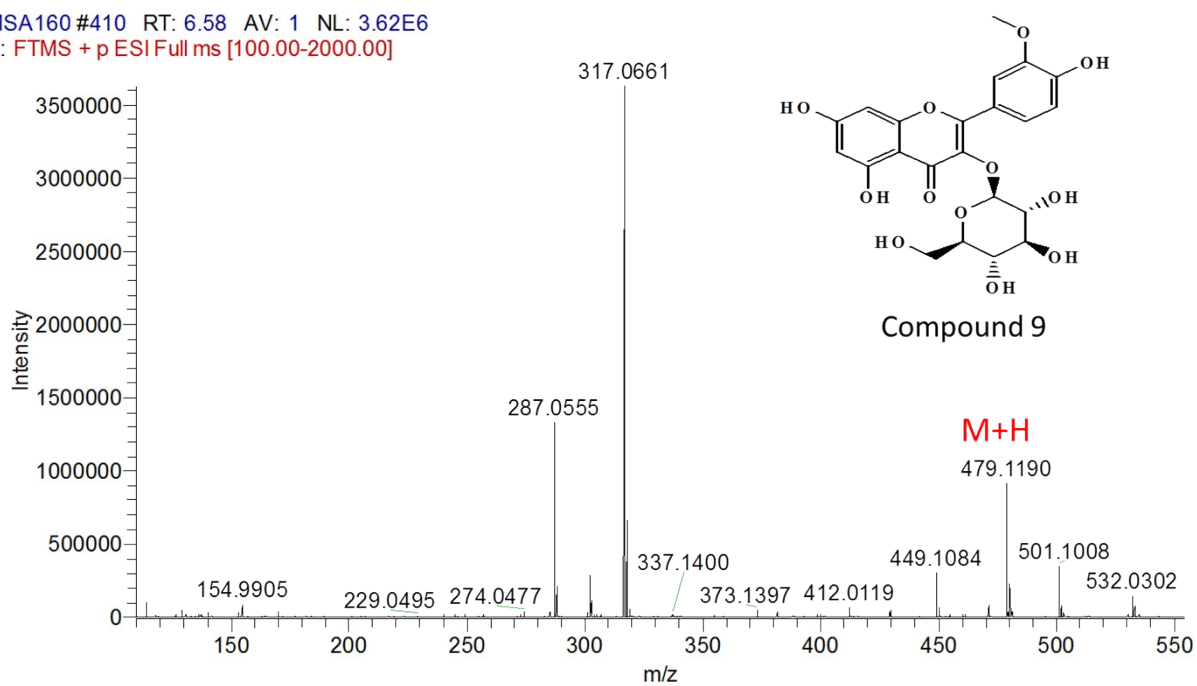

**Fig. S34** Positive HR-ESI-MS spectrum of compound **9**.
